# Supplementary material
Source: ML conference proceedings conference paper supplement (https://openreview.net/forum?id=8Vy1x9IO0Z)
Supplement: supplementary_material [file contextualPricingSupplementary.pdf › contextualPricingSupplementary.pdf]

---

# Contextual Dynamic Pricing with Heterogeneous Buyers

---

Anonymous Author(s)

Affiliation

Address

email

## Abstract

We initiate the study of contextual dynamic pricing with a heterogeneous population of buyers, where a seller repeatedly (over  $T$  rounds) posts prices that depend on the observable  $d$  dimensional context and receives binary purchase feedback. Unlike prior work assuming homogeneous buyer types, in our setting the buyer's valuation type is drawn from an unknown distribution with finite support  $K_*$ . We develop a contextual pricing algorithm based on Optimistic Posterior Sampling with regret  $\tilde{O}(K_*\sqrt{dT})$ , which we prove to be tight in  $d$  and  $T$  up to logarithmic terms. Finally, we refine our analysis for the non-contextual pricing case, proposing a variance-aware Zooming algorithm that achieves the optimal dependence on  $K_*$ .

## 1 Introduction

In online learning for contextual pricing, a learner (aka seller) repeatedly sets prices for different products with the goal of maximizing revenue through interactions with agents (aka buyers or customers). Concretely, in each round  $t = 1, \dots, T$ , nature selects a product with a  $d$ -dimensional feature representation  $u_t$  (context) and the seller selects a price  $p_t \geq 0$ . In the simplest variant, the *linear valuation model*, customers have a fixed intrinsic valuation model (type) that is unknown to the learner; this has a  $d$ -dimensional representation  $\theta^*$  whose coordinates reflect the valuation that each product feature adds, i.e., the customer's valuation is  $v_t = \langle \theta^*, u_t \rangle + \varepsilon_t$  where  $\varepsilon_t$  is a noise term. The customer makes a purchase only when their valuation is higher than the price, i.e.,  $v_t \geq p_t$ . The learner's goal is to maximize revenue, i.e., the sum of the prices in rounds when purchases occur. An equivalent objective is to minimize *regret*, which is measured against a benchmark that always selects the customer's valuation as the price for the given round.

One key difficulty is that the learner faces both an infinite action space (i.e., all possible prices) and a discontinuous revenue function, hence causing sharp revenue loss for the learner. However, the problem offers a richer feedback structure than classical multi-armed bandits: a non-purchase indicates that all higher prices would also be rejected by the buyer, while a purchase confirms that all lower prices would be accepted too. The two primary approaches from the literature to tackle this problem involve estimating the unknown parameter  $\theta^*$  through online regression or multi-dimensional binary search (see Section 1.1 for further discussion).

A crucial limitation for both approaches is that they require all customers to behave *homogeneously* according to a single type  $\theta^*$  (see related work for results robust to small deviations from this assumption). Moving beyond this homogeneity assumption, we pose the following question:

*How can one design contextual pricing algorithms with a heterogeneous population of customers?*

## 33 1.1 Our contribution

34 **Our setting (Section 2).** To study contextual pricing with a heterogeneous buyer population, we  
 35 assume that the type  $\theta_t$  in round  $t$  is drawn from a fixed, unknown distribution  $D_\star$ . When  $D_\star$  is  
 36 supported on a single type  $\theta_\star$ , we recover the homogeneous setting. In our model, the number of  
 37 distinct buyer types  $K_\star = |\text{supp } D_\star| (> 1)$  reflects the *degree of heterogeneity*.

38 There are several obstacles to applying existing algorithms from the literature. First, canonical  
 39 contextual pricing algorithms based on linear regression either compete against (simple) linear  
 40 policies or assume context-independent and identically distributed (i.i.d.) valuation noise. In contrast,  
 41 the optimal policy in our setting may best respond based on a *context-dependent* type rather than  
 42 a *fixed* type, and the stochasticity due to heterogeneity is inherently context-dependent and thus  
 43 non-i.i.d. Second, given that *the buyer types are not observable*, one cannot connect the observed  
 44 feedback to shrinkage of type-dependent uncertainty sets; this rules out running canonical multi-  
 45 dimensional binary search / contextual pricing algorithms for each buyer type in parallel. Third,  
 46 since in our setting there is a *continuum of actions*, any canonical contextual bandits algorithm whose  
 47 regret scales with the discretized action count (e.g., EXP4) will suffer suboptimal performance.

48 **Our contextual pricing algorithm (Section 3).** To tackle the above challenges, we employ recent  
 49 advances in the contextual bandit literature that attain a better scaling with the number of actions,  
 50 thus evading the shortcomings of EXP4 with naïve discretization. In particular, we build on the  
 51 *Optimistic Posterior Sampling* (OPS) approach [29] which, in our setting, maintains a posterior  $\mu_t$   
 52 over all candidate type distributions. We call these candidate type distributions *models* and refer to  
 53 their (possibly infinite) family as  $\mathcal{D}$ . At a high level, in every round, OPS best responds to a model  
 54 sampled from  $\mu_t$ . As typical in online learning, the posterior update penalizes models that *disagree*  
 55 with the observed feedback (*model mismatch*) aiming to converge to the model  $D_\star$ . To encourage  
 56 exploration in the absence of full information, this penalty is reduced by an *optimism bias* term that  
 57 rewards models with the highest potential to positively contribute to the revenue. The OPS approach  
 58 enables regret bounds of  $\sqrt{T \cdot c \cdot \log |\mathcal{D}|}$ , scaling with a *disagreement coefficient*  $c$  that measures  
 59 the structural complexity of the reward functions and captures the tension between exploration and  
 60 exploitation. Note that  $c$  can be significantly smaller than the number of actions.

61 Our main technical contributions in adapting OPS to heterogeneous contextual pricing are twofold.  
 62 First, to bound the disagreement coefficient  $c$ , we observe that, for any fixed context, the aggregate  
 63 demand function induced by  $D_\star$  has at most  $K_\star$  “jumps”,<sup>1</sup> thus creating  $K_\star + 1$  intervals. Over each  
 64 interval, we bound the disagreement coefficient by a factor of 2. Combining these arguments with a  
 65 novel decomposition lemma for the disagreement coefficient of functions with  $K_\star$  breakpoints, we  
 66 show that  $c \leq 2(K_\star + 1)$ . When  $K_\star$  is known, we apply a variant of OPS over a finite covering of the  
 67 class  $\mathcal{D}$  containing *all* possible distributions over  $K_\star$  types, of log cardinality  $dK_\star \log T$ . Second, to  
 68 extend our sublinear regret guarantee to the infinite model class  $\mathcal{D}$ , we modify OPS to conservatively  
 69 perturb its recommended prices (which cannot overly impact regret due to one-sided Lipschitzness  
 70 of the revenue function). We then construct a coupling between the actual trajectory of OPS and  
 71 one where  $D_\star$  belongs to the finite cover, allowing us to transfer regret bounds. Finally, we adapt to  
 72 unknown  $K_\star$  by initializing OPS with a non-uniform prior over models. These technical contributions  
 73 enable us to show a regret guarantee of  $\tilde{O}(K_\star \sqrt{dT})$ . Finally, we show that this guarantee is optimal  
 74 (up to logarithmic terms) with respect to the dependence on both the contextual dimension  $d$  and the  
 75 time horizon  $T$ , establishing a lower bound of  $\Omega(\sqrt{K_\star dT})$  for sufficiently large  $T = \Omega(dK_\star^3)$ .

76 **Non-contextual improvements (Section 4).** The above upper and lower bounds raise a natural  
 77 question on the optimal dependence on the number of buyer types  $K_\star$ ; we resolve this question in the  
 78 non-contextual version of the problem ( $d = 1$ ) by providing an algorithm with an upper bound of  
 79  $\tilde{O}(\sqrt{K_\star T})$ . Our algorithm, ZoomV, combines zooming (i.e., adaptive discretization) methods from  
 80 Lipschitz bandits [13] with variance-aware confidence intervals [2]. We show that the regret of ZoomV  
 81 scales with a novel variance-aware zooming dimension that can be significantly smaller than the  
 82 standard measure of complexity for Lipschitz bandits. For pricing, this variance adaptation unlocks  
 83 our  $\tilde{O}(\min\{\sqrt{K_\star T}, T^{2/3}\})$  bound (versus  $O(T^{2/3})$ , obtained via the standard zooming analysis).

84 We note that the non-contextual version of pricing for heterogeneous buyers has been previously  
 85 studied by [4], who establish a matching upper and lower bound if all types are “well separated” from

<sup>1</sup>Each “jump” corresponds to a change of type from (say) type  $i$  to type  $i + 1$ .

each other. Although our algorithmic approach towards this guarantee is very different, our result can be viewed as a strengthening of theirs by removing this separation assumption.

**Stronger type observability (Section 5).** Finally, we consider contextual pricing under the assumption that the learner can *identify* each arriving type, i.e., where the learner observes ex-post information about the sampled type  $\theta_t$ . We analyze two observability models: one where the learner receives a discrete identifier  $z_t \in [K_\star]$ —under which a computationally efficient pricing algorithm matches the  $\tilde{O}(K_\star \sqrt{dT})$  bound of OPS—and another where the full type vector  $\theta_t \in \mathbb{B}^d$  is observed—for which we reduce the dependence on  $K_\star$  and  $d$  to achieve regret  $\tilde{O}(\sqrt{\min\{K_\star, d\}T})$ . These results demonstrate how richer feedback reduces complexity in dynamic pricing.

**Related work.** We briefly review three existing lines of work, deferring full discussion to Appendix A. The closest to ours is *contextual pricing/search*, where a learner interacts with nature to learn a hidden vector  $\theta^\star \in \mathbb{R}^d$  while receiving single-bit feedback [5, 18, 21, 17, 12, 11, 6, 19]. Under an appropriate pricing loss, this setting reduces to ours with a *homogeneous* buyer population, i.e.,  $K_\star = 1$ . However, the deterministic nature of the feedback leads to aggressive search policies via cutting planes that do not lend themselves to the heterogeneous case. Although some works tolerate i.i.d., context-independent valuation noise [12, 11, 6, 19], their methods do not treat our non-i.i.d., context-dependent noise due to heterogeneity. Next is the case of *non-contextual dynamic pricing* where  $d = 1$ , originally treated with multi-armed bandits methods by [14]. The closest non-contextual work is [4], whose finite-types model reduces to ours with  $d = 1$ . We improve upon their regret bound, but neither our improvement nor the existing methods generalize readily to the contextual setting. Finally, our setting relates to *Lipschitz bandits*. Although revenue is *not* fully Lipschitz, it satisfies a *one-sided Lipschitzness*, enabling the use of zooming [13] when  $d = 1$  (see, e.g., [24]). We successfully refine these for the non-contextual case, but contextual variants of zooming [26, 15] scale with complexity parameters which admit no direct bounds for heterogeneous pricing.

## 2 Setup and Preliminaries

**Notation.** Let  $\|\cdot\|$  and  $\langle \cdot, \cdot \rangle$  denote the Euclidean norm and inner product on  $\mathbb{R}^d$ . Let  $\mathbb{S}^{d-1}, \mathbb{B}^d \subseteq \mathbb{R}^d$  denote the unit sphere and ball, respectively. Let  $\Delta(S)$  denote the set of all probability measures on a measurable set  $S \subseteq \mathbb{R}^d$ , and let  $\text{supp}(D)$  denote the support of  $D \in \Delta(\mathbb{R}^d)$ . We use  $\Delta_k(S)$  for those  $D \in \Delta(S)$  with  $|\text{supp}(D)| \leq k$ . For a positive integer  $m$ , let  $[m] := \{1, 2, \dots, m\}$ .

**Setup.** We consider  $T$  rounds of repeated interaction between a seller, a population of buyers, and an adversary. At each round  $t \in [T]$ , the seller posts a price  $p_t \in [0, 1]$  for an item to be sold and a buyer, sampled from the population, decides whether or not to buy the item based on their valuation  $v_t \in [0, 1]$ . We denote the indicator of their purchase by  $y_t = \mathbb{1}\{v_t \geq p_t\}$ . The valuation of the buyer is determined by two factors: their *type*  $\theta_t$  (encoding their intrinsic preferences), and an external *context*  $u_t$ , which describes the current item to be sold and any relevant environmental factors. The learner does *not* know  $\theta_t$ , but they *do* know  $u_t$ . We use a linear valuation model: i.e.,  $\theta_t$  and  $u_t$  lie in  $d$ -dimensional spaces  $\Theta \subseteq [0, 1]^d$  and  $\mathcal{U} \subseteq \mathbb{S}^{d-1}$ , respectively, and take  $v_t = \langle \theta_t, u_t \rangle$ . We assume that  $\langle \theta, u \rangle \in [0, 1]$  for all  $\theta \in \Theta$  and  $u \in \mathcal{U}$ . We impose no further assumptions on the contexts, allowing them to be generated (potentially adaptively) by the adversary. On the other hand, we assume that each  $\theta_t$  is sampled independently from a fixed distribution  $D_\star \in \Delta(\Theta)$  that describes the buyer population, unknown to the seller. All together, the following occur at each round  $t \in [T]$ :

1. the adversary selects a context  $u_t \in \mathcal{U}$ ;
2. a buyer arrives with type  $\theta_t \in \Theta$  sampled independently from  $D_\star$ , with valuation  $v_t = \langle u_t, \theta_t \rangle$ ;
3. the seller observes  $u_t$  and posts price  $p_t \in [0, 1]$  for the item;
4. the seller observes the purchase decision  $y_t = \mathbb{1}\{v_t \geq p_t\}$  and receives revenue  $p_t y_t$ .

**Benchmark.** The seller’s goal is to maximize their cumulative revenue compared to that which they could have achieved with knowledge of  $D_\star$ . To express this concisely, we introduce some additional notation. Each distribution  $Q$  over valuations in  $[0, 1]$  induces the following:

- a demand function  $\text{dem}_Q(p) := \mathbb{P}_{v \sim Q}[v \geq p]$ ,
- an expected revenue function  $\text{rev}_Q(p) := p \cdot \text{dem}_Q(p)$ ,

- a revenue-maximizing best response  $\text{br}_Q := \arg \max_{p \in [0,1]} \text{rev}_Q(p)$  (breaking ties arbitrarily),
- and a gap function  $\text{gap}_Q(p) := \text{rev}_Q(\text{br}_Q) - \text{rev}_Q(p)$ .

Note that each type distribution  $D \in \Delta(\Theta)$  and context  $u \in \mathcal{U}$  induce a value distribution  $Q = \text{proj}(D, u)$ , where  $\text{proj}(D, u)$  is defined as the probability law of  $\langle \theta, u \rangle$  when  $\theta \sim D$ . We then set  $\text{dem}_D(p, u) := \text{dem}_Q(p)$ ,  $\text{rev}_D(p, u) := \text{rev}_Q(p)$ ,  $\text{br}_D(u) := \text{br}_Q$ , and  $\text{gap}_D(p, u) := \text{gap}_Q(p)$ , accordingly. We abbreviate a subscript of  $D_*$  by “ $\star$ ” alone, writing, e.g.,  $\text{dem}_\star(p, u)$  and  $\text{br}_\star(u)$ .

A seller policy  $\mathcal{A}$  is a (potentially randomized) map from a history  $\{u_\tau, p_\tau, y_\tau\}_{\tau=1}^{t-1}$  and the current context  $u_t$  to a posted price  $p_t$ . An adversary policy  $\mathcal{B}$  is a (potentially randomized) map from a history  $\{u_\tau, \theta_\tau, p_\tau, y_\tau\}_{\tau \in [t-1]}$  to the next context  $u_t$ . We then define the seller’s *pricing regret* by

$$R_{\mathcal{A}, \mathcal{B}}(T) = \sum_{t \in [T]} \text{gap}_\star(p_t, u_t) = \sum_{t \in [T]} (\text{rev}_\star(\text{br}_\star(u_t), u_t) - \text{rev}_\star(p_t, u_t)),$$

where  $\{u_t, p_t\}_{t \in [T]}$  are selected according to  $\mathcal{A}$  and  $\mathcal{B}$ . We will omit the policies from the subscript when clear from context. We focus on controlling the pricing regret in expectation, and will say that  $\mathcal{A}$  satisfies a regret bound  $f(T)$  if  $\mathbb{E}[R_{\mathcal{A}, \mathcal{B}}(T)] \leq f(T)$  for all  $\mathcal{B}$ .

Our guarantees will scale with context dimension  $d$  and the *degree of heterogeneity*, which we quantify via the support size  $K_\star := |\text{supp}(D_\star)|$  (that may be infinite). We do *not* assume that  $K_\star$  is known to the seller. Designing an effective seller policy is challenging because  $D_\star$ ,  $K_\star$ , and the realized buyer types are unknown to the seller, who must carefully balance exploration and exploitation given only the current context and the history of purchase outcomes.

**Basic pricing facts.** Finally, we provide some basic properties of the pricing problem, with proofs in Appendix B. Essential for this work is the one-sided Lipschitzness of the expected revenue function. This is an immediate consequence of the monotonicity of demand functions, and it has previously been used to apply techniques from Lipschitz bandits to non-contextual pricing [24].

**Lemma 2.1** (One-sided Lipschitzness). *Fix any distribution  $Q \in \Delta([0, 1])$  and let  $0 \leq p < p' \leq 1$ . We then have  $\text{rev}_Q(p') - \text{rev}_Q(p) \leq \text{dem}_Q(p)(p' - p) \leq p' - p$ .*

Throughout this work, we must handle distributional uncertainty over value distributions. To compare two distributions  $P, Q \in \mathcal{P}([0, 1])$ , we employ the *Levy metric* defined by

$$d_L(P, Q) := \inf\{\varepsilon > 0 : \text{dem}_P(x - \varepsilon) - \varepsilon \leq \text{dem}_Q(x) \leq \text{dem}_P(x + \varepsilon) + \varepsilon \forall x \in \mathbb{R}\}. \quad (1)$$

This quantity is at most 1 and equals the side length of the largest square which can be inscribed between the graphs of  $\text{dem}_P$  and  $\text{dem}_Q$  (equivalently, the CDFs of  $P$  and  $Q$ ). For type distributions  $D, D' \in \mathcal{P}(\Theta)$ , we use the Levy distance between their projected value distributions, taking  $d_L(D, D') := \sup_{u \in \mathbb{S}^{d-1}} d_L(\text{proj}(D, u), \text{proj}(D', u))$ . We use this metric because, if  $D$  and  $D'$  are close under  $d_L$ , then there exists a policy which performs well on both of them; this property motivates the use of the Lévy metric throughout the dynamic pricing literature (see, e.g., [23]).

**Lemma 2.2** (Pricing implication of Lévy metric bound). *Suppose that  $D, D' \in \Delta(\Theta)$  satisfy  $d_L(D, D') < \varepsilon$ . Then the conservative best-response policy  $\pi(u) = \max\{\text{br}_D(u) - \varepsilon, 0\}$  satisfies  $\text{rev}_D(\pi(u), u) \geq \text{rev}_D(\text{br}_D(u), u) - \varepsilon$  and  $\text{rev}_{D'}(\pi(u), u) \geq \text{rev}_{D'}(\text{br}_{D'}(u), u) - 3\varepsilon$  for all  $u \in \mathcal{U}$ .*

### 3 Contextual Algorithm with Optimal Dependence on $d$ and $T$

In this section, we develop statistically efficient algorithms for contextual pricing. In Section 3.1, we treat the simpler setting where  $D_\star$  belongs to a finite model class  $\mathcal{D}$  and  $K_\star$  is known. In Section 3.2, we remove these two assumptions and prove a lower bound with matching dependence on  $d$  and  $T$ .

#### 3.1 Warm-Up: Heterogeneous Contextual Pricing with a Finite Model Class

As a warm-up, we consider pricing when  $D_\star$  belongs to a known, finite model class.

**Assumption 3.1.** Assume that  $D_\star \in \mathcal{D}$ , where  $\mathcal{D} \subseteq \Delta(\Theta)$  is finite and known to the seller.

This realizability assumption simplifies our analysis, and the resulting algorithm extends naturally to infinite classes. We employ optimistic posterior sampling (OPS), originally studied for contextual

bandits under the name “Feel-Good Thompson Sampling” [29]. In our instantiation for contextual pricing, OPS (Algorithm 1) maintains a posterior distribution over models, initialized at prior  $\mu_1 \in \Delta(\mathcal{D})$ . At round  $t$  with context  $u_t \in \mathcal{U}$ , we sample a model  $D_t \sim \mu_t$ , play the best-response price  $p_t = \text{br}_{D_t}(u_t)$ , and observe purchase feedback  $y_t$ . Then, for each candidate model  $D \in \mathcal{D}$ , we update its posterior weight  $\mu_{t+1}(D)$  according to the loss  $\ell_\lambda(\text{proj}(D, u_t), p_t, y_t)$ , defined by

$$\ell_\lambda(Q, p, y) := \underbrace{(y - \text{dem}_Q(p))^2}_{\text{model mismatch}} - \underbrace{\lambda \text{rev}_Q(\text{br}_Q)}_{\text{optimism bias}}.$$

The “model mismatch” penalty captures the extent to which the observed demand  $y_t$  differs from that predicted by  $D$  when  $p_t$  is played. In particular, as a function of  $D \in \mathcal{D}$ , the expected model mismatch  $\mathbb{E}_{y_t}[(y_t - \text{dem}_D(p_t, u_t))^2 \mid p_t]$  is minimized only by models  $D$  which make the same prediction as  $D_*$ , i.e., those for which  $\text{dem}_D(p_t, u_t) = \text{dem}_*(p_t, u_t)$ . The “optimism bias” reduces the loss for models which have the potential to provide large revenue, ensuring that we still explore.

---

**ALGORITHM 1:** OPS: Contextual Pricing with a Finite Model Class

---

1 **Input:** finite model class  $\mathcal{D} \subseteq \Delta(\Theta)$ , support size  $K \geq 1$ ;  
2 initialize uniform prior  $\mu_1 = \text{Unif}(\mathcal{D})$  and optimism strength  $\lambda = \sqrt{\log(|\mathcal{D}|)/KT}$ ;  
3 **for each round**  $t \in [T]$  **do**  
4     observe context  $u_t$ ;  
5     sample model  $D_t \sim \mu_t$ ;  
6     play  $p_t = \text{br}_{D_t}(u_t)$  and observe  $y_t$ ;  
7     update  $\mu_{t+1}(D) \propto \mu_t(D) \exp(-\ell_\lambda(\text{proj}(D, u_t), p_t, y_t))$  for each  $D \in \mathcal{D}$ ;

---

191 **Theorem 3.2.** Under Assumption 3.1, OPS with  $K = K_*$  achieves regret  $\tilde{O}(\sqrt{K_* T \log |\mathcal{D}|})$ .

192 The requirement of known  $K_*$  is imposed for simplicity and will be removed in Section 3.2. To  
193 prove Theorem 3.2, we employ a disagreement coefficient that controls the per-context complexity of  
194 balancing exploration and exploitation. In general, for an arbitrary measurable space  $\mathcal{X}$  and function  
195 class  $\mathcal{F} : \mathcal{X} \rightarrow \mathbb{R}$ , we define the *disagreement coefficient* of  $\mathcal{F}$  by

$$\text{dis}(\mathcal{F}) := \sup_{\varepsilon, \delta > 0} \sup_{\nu \in \Delta(\mathcal{X})} \frac{\delta^2}{\varepsilon^2} \mathbb{P}_{p \sim \nu} \left( \exists f \in \mathcal{F} : \mathbb{E}_{q \sim \nu} [f(q)^2] \leq \varepsilon^2 \wedge |f(p)| > \delta \right). \quad (2)$$

Variants of this quantity have previously been used to analyze a variety of structured bandits and active learning problems (see Remark 3.7). The  $\delta^2/\varepsilon^2$  scaling was historically chosen so that  $\text{dis}(\mathcal{F})$  can be directly bounded by the domain size  $|\mathcal{X}|$ . For our application,  $\mathcal{X} = [0, 1]$  is the (infinite) price set and each function  $f \in \mathcal{F}$ , induced by a model  $D \in \mathcal{D}$  and context  $u \in \mathcal{U}$ , measures the discrepancy between the demand functions of  $D$  and  $D_*$  after projection onto  $u$ , i.e.,  $f(p) = \text{dem}_D(p, u) - \text{dem}_*(p, u)$ . In particular, we set

$$\text{dis}(\mathcal{D}, D_*) := \sup_{u \in \mathcal{U}} \text{dis}(\{\text{dem}_D(\cdot, u) - \text{dem}_*(\cdot, u) : D \in \mathcal{D}\}).$$

196 By this definition, if  $\text{dis}(\mathcal{D}, D_*)$  is small and the seller plays price  $p \sim \nu$  when faced with context  $u$ ,  
197 it is unlikely for a model  $D$  to disagree with  $D_*$  at  $p$  if it is close to  $D_*$  under the  $L^2(\nu)$  norm, i.e., if  
198  $\mathbb{E}_{q \sim \nu}[(\text{dem}_D(q, u) - \text{dem}_*(q, u))^2]$  is small. The regret of OPS is bounded by  $\text{dis}(\mathcal{D}, D_*)$  as follows.

199 **Lemma 3.3.** Under Assumption 3.1 with optimism strength  $\lambda > 0$ , OPS (Algorithm 1) achieves regret  
200  $\tilde{O}(\lambda \text{dis}(\mathcal{D}, D_*)T + \log(|\mathcal{D}|)/\lambda)$ .

201 The proof in Appendix C.3 combines the OPS analysis of [29] with a decoupling lemma due to  
202 [8]. To control  $\text{dis}(\mathcal{D}, D_*)$ , we show that each function of the form  $\text{dem}_D(\cdot, u) - \text{dem}_*(\cdot, u)$  can  
203 be decomposed into  $K_* + 1$  non-increasing pieces. In Appendix C.4, we prove the following  
204 disagreement coefficient bound for non-increasing functions.

205 **Lemma 3.4.** Let  $\mathcal{F} : [0, 1] \rightarrow \mathbb{R}$  be the set of nonincreasing functions. Then  $\text{dis}(\mathcal{F}) \leq 2$ .

206 Next, we examine a useful notion of *composite* function classes. A function class  $\mathcal{G} : \mathcal{Z} \rightarrow \mathbb{R}$  is called  
207 an  $N$ -composite of  $\mathcal{F} : \mathcal{X} \rightarrow \mathbb{R}$  if there exists a disjoint partition  $\mathcal{Z} = \mathcal{Z}_1 \cup \dots \cup \mathcal{Z}_N$  and mappings  
208  $\{h_i : \mathcal{Z}_i \rightarrow \mathcal{X}\}_{i \in [N]}$  such that each  $g \in \mathcal{G}$  can be decomposed as  $g(x) = f_i(h_i(x))$  for all  $x \in \mathcal{Z}_i$   
209 and  $i \in [N]$ , for some choice of  $\{f_i : \mathcal{X} \rightarrow \mathbb{R}\}_{i \in [N]}$ . We show the following in Appendix C.5.



210 **Lemma 3.5.** *If  $\mathcal{G}$  is an  $N$ -composite of  $\mathcal{F}$ , then  $\text{dis}(\mathcal{G}) \leq N \text{dis}(\mathcal{F})$ .*

211 *Proof of Theorem 3.2.* For each  $u \in \mathcal{U}$ , the function  $\text{dem}_*(\cdot, u)$  is piecewise constant with  $K_* + 1$   
 212 sections, since jumps can only occur at the projections of the  $K_*$  types. For any  $D \in \mathcal{D}$ , the demand  
 213  $\text{dem}_D(\cdot, u)$  is monotonic, since increasing price always reduces demand. Thus,  $\text{dem}_D(\cdot, u) -$   
 214  $\text{dem}_*(\cdot, u)$  is non-increasing on each of the  $K_* + 1$  sections, and so the function classes defining  
 215  $\text{dis}(\mathcal{D}, D_*)$  are  $(K_* + 1)$ -composites of the non-increasing function class. Applying Lemmas 3.4  
 216 and 3.5 then implies that  $\text{dis}(\mathcal{D}, D_*) \leq 2(K_* + 1)$ . The theorem then follows by the regret bound of  
 217 Lemma 3.3 and our choice of  $\lambda$ .  $\square$

218 **Remark 3.6** (Comparison to Thompson sampling). *Standard Thompson sampling corresponds to the*  
 219 *alternative choice of log losses:  $\ell(Q, p, y) = \log \mathbb{P}_{z \sim \text{Ber}(\text{dem}_Q(p))}[z = y] = y \log \text{dem}_Q(p) + (1 -$*   
 220  *$y) \log(1 - \text{dem}_Q(p))$ . In comparison, OPS uses the squared loss (this is not essential but simplifies*  
 221 *analysis) and an optimism bias towards models under which the seller can attain large revenue. This*  
 222 *is crucial for obtaining frequentist (rather than Bayesian) regret bounds, as outlined in [29].*

223 **Remark 3.7** (Relation with existing results). *Variants of the disagreement coefficient and the related*  
 224 *Alexander capacity are well-studied in the active learning and empirical process theory literature*  
 225 *[9]. The version above was first considered by [7]. [8] proved a regret bound which translates to*  
 226  *$\tilde{O}(\sqrt{\text{dis}(\mathcal{D})T \log |\mathcal{D}|})$  in our setting, matching Theorem 3.2. However, the estimation-to-decisions*  
 227 *(E2D) meta-algorithm which they employ is non-constructive, hence we apply OPS instead. In [29],*  
 228 *the regret of OPS is controlled by a distinct “decoupling coefficient.” Our proof of Lemma 3.3 shows*  
 229 *that a (slightly modified) decoupling coefficient is bounded by the disagreement coefficient.*

### 230 3.2 The General Case

231 We now seek to eliminate the assumptions that  $D_*$  belongs to a finite class  $\mathcal{D}$  and that the support  
 232 size  $K_*$  is known to the seller. For the first point, we loosen the requirement that  $D_*$  belongs to  
 233  $\mathcal{D}$  and take  $\mathcal{D}$  to be a large, finite cover of the full distribution space  $\Delta(\Theta)$ . Then, we replace the  
 234 uniform prior  $\mu_1$  with a non-uniform prior that places less weight on models with large support sizes.  
 235 Ultimately, this will enable a choice of optimism strength  $\lambda$  that is independent of  $K_*$ , achieving our  
 236 second goal. Unfortunately, if  $D_*$  is close but not equal to a model in  $\mathcal{D}$ , our analysis of OPS fails.

237 To remedy this, we employ perturbed OPS (POPS, Algorithm 2), an OPS variant with conservatively  
 238 perturbed and discretized prices. This modified algorithm and its analysis require some new notation.  
 239 Given a value distribution  $Q \in \Delta([0, 1])$ , define the  $\varepsilon$ -smoothed demand function  $\text{dem}_Q^\varepsilon$  by

$$\text{dem}_Q^\varepsilon(p) := \mathbb{E}_{\delta \sim \text{Unif}([0, \varepsilon])} [\text{dem}_Q(p - \delta)].$$

240 Similarly, we let  $\text{rev}_Q^\varepsilon(p) := p \text{dem}_Q^\varepsilon(p)$ . Define contextual extensions  $\text{dem}_D^\varepsilon(p, u)$  and  $\text{dem}_D^\varepsilon(p, u)$   
 241 as in the non-smoothed case. To incorporate discretization, write  $\mathcal{P}_\varepsilon := \varepsilon \mathbb{N} \cap [0, 1]$  for prices which  
 242 are multiples of  $\varepsilon$  and define  $\text{br}_Q^\varepsilon := \arg \max_{p \in \mathcal{P}_\varepsilon} \text{rev}_Q^\varepsilon(p)$  (lifting to  $\text{br}_D^\varepsilon(u)$  as before).

243 Now, at each round  $t \in [T]$ , POPS samples a model  $D_t \sim \mu_t$  from the current posterior  $\mu_t \in \Delta(\mathcal{D})$   
 244 and computes its (discretized) best response  $\hat{p}_t = \text{br}_{D_t}^\varepsilon(u_t)$ . Instead of posting price  $\hat{p}_t$  directly,  
 245 POPS posts  $p_t = \max\{\hat{p}_t - \delta_t, 0\}$ , where  $\delta_t \sim \text{Unif}([0, \varepsilon])$  is a small random perturbation. Due to  
 246 this perturbation and discretization, we employ the modified loss  $\ell_\lambda^\varepsilon(\text{proj}(D_t, u_t), \hat{p}_t, y_t)$ , where

$$\ell_\lambda^\varepsilon(Q, \hat{p}, y) := (\text{dem}_Q^\varepsilon(\hat{p}) - y)^2 - \lambda \text{rev}_Q^\varepsilon(\text{br}_Q^\varepsilon).$$

247 The perturbations allow us, in the analysis of POPS, to couple its trajectory when run with  $D_* \notin \mathcal{D}$  to  
 248 a trajectory where  $D_* \in \mathcal{D}$ . The discretization is needed to bound a modified disagreement coefficient  
 249 which appears in the analysis. All together, we obtain the following.

250 **Theorem 3.8.** *POPS (Algorithm 2) achieves regret  $\tilde{O}(K_* \sqrt{dT})$  with appropriately tuned parameters*  
 251 *and without prior knowledge of  $K_*$ . Moreover, even for known  $K_* \geq 2$  and stochastic contexts, no*  
 252 *contextual pricing policy can achieve expected regret  $o(\sqrt{K_* dT})$  for all instances if  $T \geq d \cdot K_*^3$ .*

253 For the upper bound, our analysis views the perturbation at Step 5 as performed by nature, rather than  
 254 the seller. Treating the seller’s action as  $\hat{p}_t$ , they then observe a purchase ( $y_t = 1$ ) with probability

$$\mathbb{E}_{\delta_t} [\text{dem}_*(\max\{\hat{p}_t - \delta_t, 0\}, u_t) \mid \hat{p}_t, u_t] = \mathbb{E}_{\delta_t} [\text{dem}_*(\hat{p}_t - \delta_t, u_t) \mid \hat{p}_t, u_t] = \text{dem}_*^\varepsilon(\hat{p}_t, u_t),$$

---

**ALGORITHM 2:** Perturbed OPS (POPS) for Contextual Pricing with Infinite Model Class

---

**1 Input:** discretization error  $\varepsilon \in [0, 1]$ , finite model cover  $\mathcal{D} \subseteq \Delta(\Theta)$ ,  
 model prior  $\mu_1 \in \Delta(\mathcal{D})$ , optimism strength  $\lambda > 0$ ;  
**2 for each round**  $t \in [T]$  **do**  
**3**   observe context  $u_t$ ;  
**4**   sample model  $D_t \sim \mu_t$  and perturbation strength  $\delta_t \sim \text{Unif}([0, \varepsilon])$ ;  
**5**   play  $p_t = \max\{\hat{p}_t - \delta_t, 0\}$ , where  $\hat{p}_t = \text{br}_{D_t}^\varepsilon(u_t)$  and observe  $y_t$ ;  
**6**   update  $\mu_{t+1}(D) \propto \mu_t(D) \exp(-\ell_\lambda^\varepsilon(\text{proj}(D, u_t), \hat{p}_t, y_t))$  for each  $D \in \mathcal{D}$ ;

---

justifying the definitions above. Through this lens, POPS can be viewed as OPS for an alternative, smoothed demand model. To bound regret, we apply a three-step argument. First, we show that POPS maintains our OPS regret bound when  $D_\star \in \mathcal{D}$ . This requires bounding a modified decoupling coefficient and is the only step where discretization is used. A direct application of the previous OPS analysis provides a regret bound with respect to a smoothed and discretized benchmark. Fortunately, one-sided Lipschitzness of revenue (Lemma 2.1) ensures that this modified regret benchmark is within  $O(\varepsilon T)$  of the original benchmark, as we prove in Appendix C.6.

**Lemma 3.9.** *Under Assumption 3.1, using prior  $\mu_1 \in \Delta(\mathcal{D})$ , discretization error  $\varepsilon \in [0, 1]$ , and optimism strength  $\lambda > 0$ , POPS (Algorithm 2) achieves regret  $\tilde{O}(\lambda K_\star T + \log(1/\mu_1(D_\star))/\lambda + \varepsilon T)$ .*

Next, we show that, if there exists  $D \in \mathcal{D}$  whose smoothed demand function uniformly approximates that of  $D_\star$ , then the trajectory of POPS under  $D_\star$  can be coupled with that under  $D$ , such that the trajectories coincide with high probability. See Appendix C.7 for the proof.

**Lemma 3.10.** *If there exists  $D \in \mathcal{D}$  for which  $\|\text{dem}_D^\varepsilon - \text{dem}_{D_\star}^\varepsilon\|_\infty \leq \varepsilon$ , then the trajectory  $\{u_t, \hat{p}_t, y_t\}_{t=1}^T$  of POPS with type distribution  $D^\star$  can be coupled with that  $\{u'_t, \hat{p}'_t, y'_t\}_{t=1}^T$  of POPS with type distribution  $D$ , such that the two trajectories are identical with probability  $1 - \varepsilon T$ .*

Finally, we show that, to obtain a uniform  $\varepsilon$ -cover of the smoothed demand functions, it suffices to find a  $O(\varepsilon^2)$ -cover of the type distributions under the Lévy metric  $d_L$ , as defined in (1). Moreover, we show that the family of all type distributions with support size at most  $K$ ,  $\Delta_K(\Theta)$ , admits an appropriately small Lévy cover. For notation, we write  $N(X, d, \tau)$  for the size of the smallest subset  $X' \subseteq X$  which covers set  $X$  under metric  $d$  up to accuracy  $\tau$  (i.e., for each  $x \in X$ , there exists  $x' \in X'$  such that  $d(x, x') \leq \tau$ ). A proof of the following appears in Appendix C.8.

**Lemma 3.11.** *If  $D, D' \in \Delta(\Theta)$  satisfy  $d_L(D, D') \leq \varepsilon^2/2$ , then  $\|\text{dem}_D^\varepsilon - \text{dem}_{D'}^\varepsilon\|_\infty \leq \varepsilon$ . Moreover, we have  $\log N(\Delta_K(\Theta), d_L, \varepsilon) = \tilde{O}(dK \log 1/\varepsilon)$ .*

In Appendix C.9, we combine these lemmas to obtain the upper bound. For the lower bound, we modify a construction of [4] for the non-contextual case so that it can be tensored into  $d$ -dimensions without leaking information between orthogonal contexts.

## 4 Non-Contextual Refinements via Zooming

Our results from Section 3 leave a key open question: what is the optimal regret dependence on  $K_\star$ ? We resolve this question for the non-contextual setting, where  $d = 1$  and, without loss of generality,  $u_t \equiv 1$  for all  $t$ . To do so, we employ adaptive discretization (aka *zooming*) methods from Lipschitz bandits [13] with novel variance-aware confidence intervals and achieve a regret bound of  $\tilde{O}(\sqrt{K_\star T})$ . Throughout, we label the  $K_\star$  types  $\text{supp}(D_\star) = \{\theta^{(1)} < \theta^{(2)} < \dots < \theta^{(K_\star)}\}$  and set  $\theta^{(0)} = 0$ .

Our algorithm, ZoomV, mirrors standard zooming [13] with two key adjustments. First, since revenue is only one-sided Lipschitz, we use a dyadic price selection rule inspired by [24]. Second, our confidence intervals incorporate empirical variance, a method previously used for variance-aware  $K$ -armed bandits [2]. In more detail, ZoomV maintains a set  $S$  of active prices in  $[0, 1]$  and a variance-aware confidence interval for the expected revenue at each  $p \in S$ . Each active price “covers” an interval of neighboring, larger prices, with the width of this covering interval scaling proportionally to that of the confidence interval. The intuition is that a small increase in price can only marginally increase expected revenue, so it is not worth exploring such covered prices. Initially, every price in

[0, 1] is covered by some point in  $S$ . At each round, ZoomV optimistically chooses a price in  $S$  and updates its confidence and covering intervals. If after the update there exists an uncovered price, then we add a new point to  $S$  which covers it, maintaining the invariant that every price is covered.

**Theorem 4.1.** ZoomV (Algorithm 4) achieves regret  $\tilde{O}(\min\{\sqrt{K_*T}, T^{2/3}\})$  for non-contextual pricing with heterogeneous buyers, without knowledge of  $K_*$ .

To bound regret, we employ a variance-aware zooming dimension which controls its performance. For comparison, we first recall the definition of the standard zooming dimension, which characterizes a certain complexity of the expected reward function  $\text{rev}(p)$ . For each  $\delta > 0$ , write  $X_\delta := \{p \in [0, 1] : \text{gap}_*(p) \leq \delta\}$  for the set of  $\delta$ -approximate revenue maximizers. Write  $N(X, \delta) := N(X, |\cdot|, \delta)$  for the smallest  $\delta$ -covering of a set  $X \subseteq \mathbb{R}$ . Then, for each  $c > 0$ , define the *zooming dimension*

$$\text{ZoomDim}(c) := \inf\{z \geq 0 : N(X_\delta, \delta/10) \leq c\delta^{-z} \forall \delta > 0\}.$$

To address variance, write  $\sigma^2(p) = p^2 \text{dem}_*(p)(1 - \text{dem}_*(p))$  for the revenue variance when  $p$  is played. We then define the variance-weighted covering number  $N_v(X, \delta) := \min\{\sum_{x \in X'} \sigma^2(x) : X' \text{ is a } \delta\text{-cover of } X\}$ . Finally, for each  $c > 0$ , we define the *variance-aware zooming dimension*

$$\text{ZoomDimV}(c) := \inf\{z \geq 0 : N_v(X_\delta, \delta/10) \leq c\delta^{-z} \forall \delta > 0\}.$$

Note that  $\text{ZoomDimV}(c) \leq \text{ZoomDim}(c)$ , since  $\sigma^2(p) \leq 1$ .

We prove the following regret bound, mirroring standard zooming guarantees (see Theorem 1.3 of [13]), but with ZoomDim improved to ZoomDimV. The proof can be found in Appendix D.1. Then in the lemma afterwards, we bound our modified zooming dimension for the pricing problem.

**Lemma 4.2.** For  $c > 0$ , ZoomV achieves regret  $\tilde{O}(c^{1/(2+z)} T^{1-1/(2+z)})$ , where  $z = \text{ZoomDimV}(c)$ .

**Lemma 4.3.** We have  $\text{ZoomDimV}(10K_*) = 0$  and  $\text{ZoomDimV}(10) \leq \text{ZoomDim}(10) \leq 1$ .

*Proof.* For each  $\delta > 0$  and type  $i \in [K_*]$ , let  $X_\delta^{(i)}$  denote the set of activated arms  $p$  with  $\text{gap}_*(p) \leq \delta$  that lie in the interval  $(\theta^{(i-1)}, \theta^{(i)})$ , to the left of type  $i$ . Since revenue is linearly increasing within each such interval, with slope  $d_i = \text{dem}(\theta^{(i)})$ , the gap condition requires that each  $p \in X_\delta^{(i)}$  also satisfies  $p \geq \theta^{(i)} - \delta d_i^{-1}$ . Moreover, for  $p \in X_\delta^{(i)}$ , we have  $\sigma^2(p) \leq d_i$ . Thus, we obtain

$$N_v(X_\delta, \delta/20) \leq \sum_{i \in [K_*]} N_v(X_\delta^{(i)}, \delta/20) \leq \sum_{i \in [K_*]} 10d_i^{-1} \cdot d_i \leq 20K_*,$$

implying the first bound. For the second, we note that  $N(X_\delta, \delta/20) \leq N([0, 1], \delta/20) \leq 20\delta^{-1}$ .  $\square$

*Proof of Theorem 4.1.* The  $\sqrt{K_*T}$  bound follows by Lemma 4.2 with  $c = 4K_*$  and  $z = 0$ , using Lemma 4.3. Similarly, the  $T^{2/3}$  bound follows by taking  $c = 2$  and  $z = 1$ .  $\square$

**Remark 4.4** (Comparison to [4]). The non-contextual setting was previously studied by [4], whose Algorithm 1 achieves regret  $\tilde{O}(\sqrt{K_*T}) + V(V+1)$ , where  $V = \max_{i \in [K_*]} (\theta^{(K_*)})^4 (\theta^{(i)} - \theta^{(i-1)})^{-5}$ . They maintain a set of intervals which contain all types with substantial probability mass, gradually refining these intervals until they are all of width  $O(T^{-1/2})$ , at which point they employ UCB over the intervals' left endpoints. Unfortunately, the instance-dependent term  $V(V+1)$  can blow up to infinity for worst-case realizations of  $D_* \in \Delta_{K_*}([0, 1])$ , in contrast to our guarantee.

**Remark 4.5** (Performance of standard zooming). Although original zooming bounds were for two-sided Lipschitz rewards, [24] noted that these extend to the one-sided case. In particular, Corollary 3.1 of [24] implies the regret bound of Lemma 4.2 with  $z = \text{ZoomDim}(c)$ . Inspecting the proof of Lemma 4.3, we have  $\text{ZoomDim}(10K_*d_{\min}^{-1}) = 0$ , where  $d_{\min}$  is the smallest demand at any of the  $K_*$  types. This gives regret  $\tilde{O}(\sqrt{K_*T/d_{\min}})$ , which can be arbitrarily larger than  $\sqrt{K_*T}$ . One could hope that there is still some room for improvement, since small demands for near-optimal prices imply that the best achievable revenue is also small. However, even when  $K_* = 1$  and the analysis is the simplest, this leads to an unsatisfactory regret bound of  $\tilde{O}(\min\{\sqrt{T/d_{\min}}, d_{\min}T\}) = \tilde{O}(T^{2/3})$ .



## 5 Improved Performance with Ex-Post Type Observability

We study dynamic pricing with heterogeneous buyers, assuming the learner can *identify* each arriving type. After setting a price  $p_t$ , the learner observes the pricing feedback  $\mathbb{1}\{\langle u_t, \theta_t \rangle \geq p_t\}$  and some information about the sampled type  $\theta_t$ . We consider the two models of observability. In the first model, the learner only observes an identifier  $z_t \in [K_\star]$  that specifies which of the  $K_\star$  candidate types was drawn. In practice, the learner need not know  $K_\star$  *a priori*. Here, we design an algorithm that matches the  $\tilde{O}(K_\star \sqrt{dT})$  regret bound of POPS and can be implemented efficiently, using a contextual search algorithm for  $K_\star = 1$  as a subroutine. In the second model, the learner observes the full type embedding  $\theta_t \in \Theta$ . Here, we show that best-responding to a simple plug-in estimate for  $D_\star$  achieves an improved regret bound of  $\tilde{O}(\sqrt{\min\{K_\star, d\}T})$ .

**Observed type identifiers.** Our algorithm for the model where the learner only observes the identifier uses a  $K_\star = 1$  contextual search algorithm, ProjectedVolume [18], as a subroutine. We maintain a separate instance of this ProjectedVolume algorithm for each observed type and keep track of the empirical type frequencies along with the number of times we’ve explored each type. It then adaptively chooses which types to explore (or exploit) based on confidence estimates for the type distribution. We present the full algorithm and prove the following regret bound in Appendix E.1.

**Theorem 5.1.** *Consider contextual dynamic pricing with ex-post type observability where the learner observes which type  $z_t \in [K_\star]$  arrived. Then, Algorithm 5 achieves regret  $\tilde{O}(K_\star \sqrt{dT})$  and takes no more than time  $\text{poly}(K_\star, d, T)$  per round.*

**Observed type vectors.** If the full type vector  $\theta_t$  is revealed at the end of each round, we can achieve improved regret with a simpler algorithm. Indeed, writing  $\hat{D}_t = \frac{1}{t} \sum_{\tau=1}^t \delta_\tau$  for the empirical type distribution after round  $t$ , we take each  $p_t$  as the best response to  $\hat{D}_{t-1}$  along the current context.

**Theorem 5.2.** *Consider contextual dynamic pricing with ex-post type observability where the learner observes  $\theta_t \in \Theta$  at the end of each round. Then the algorithm which plays  $p_1 = 1/2$  and best response  $p_t = \text{br}_{\hat{D}_{t-1}}(u_t)$  for remaining rounds achieves regret  $\tilde{O}(\sqrt{\min\{K_\star, d\}T})$ . Each price can be computed in time  $\text{poly}(K_\star, d)$ .*

The proof in Appendix E.2 observes that the empirical revenue function  $\text{rev}_{\hat{D}_t}$  converges uniformly in both arguments (price and context) to the true revenue function  $\text{rev}_\star$ . This occurs at rate  $\sqrt{V/t}$ , where  $V$  is the VC dimension of the function class  $\{\theta \in \text{supp}(D_\star) \mapsto \mathbb{1}\{\langle u, \theta \rangle \geq p\} : u \in \Theta, p \in [0, 1]\}$ . This is a family of linear thresholds in  $\mathbb{R}^d$ , so  $V \leq d + 1$ . Moreover, the domain has size  $K_\star$ , so  $V \leq K_\star$ . We thus obtain the claimed regret bound of  $\tilde{O}(\sum_{t=1}^T \sqrt{\min\{K_\star, d\}/t}) = \tilde{O}(\sqrt{\min\{K_\star, d\}T})$ .

## 6 Discussion

In this work, we have introduced contextual dynamic pricing with heterogeneous buyers. Our main algorithm achieves a regret bound of  $\tilde{O}(K_\star \sqrt{dT})$ , which is optimal up to  $\sqrt{K_\star}$ . Our analysis bounds the disagreement coefficient by leveraging a novel decomposition lemma for aggregate demand functions with  $K_\star$  breakpoints. Additionally, we propose a variance-aware zooming algorithm for the non-contextual pricing case and improve regret dependence on  $K_\star$  by incorporating adaptive discretization methods from the Lipschitz bandits literature. Finally, under stronger observability assumptions on the buyers’ types, we develop efficient algorithms that significantly reduce regret to  $\tilde{O}(\sqrt{\min\{K_\star, d\}T})$ , demonstrating the benefits of richer feedback in dynamic pricing settings.

There are several research questions that stem from our work. The first question revolves around *computation*. Our algorithms are dependent on the size of the model class, which is exponential in  $K_\star, d, T$ . It would be interesting to know if polynomial dependence can be achieved at the same regret rate. The second question is around the optimal dependence on  $K_\star$  for the general, contextual case. While in Section 4 we showed how to optimize the dependence of our bounds on  $K_\star$  it is unclear how to scale this approach for the contextual version of the problem. One starting point could be the results on Zooming techniques for contextual bandits (see e.g., [26]). Finally, it would be interesting to see if our results can be applied to broader settings where a learner tries to learn from heterogeneous agents while receiving only binary feedback: for example, it is unknown if the approach presented in this work generalizes to general contextual search settings (i.e., with  $\varepsilon$ -ball or symmetric loss) or if it generalizes for settings that share some core properties with pricing, but differ in the fundamental techniques used to address them (see e.g., [10]).

## References

- [1] K. Amin, A. Rostamizadeh, and U. Syed. Repeated contextual auctions with strategic buyers. *Advances in Neural Information Processing Systems*, 27, 2014.
- [2] J.-Y. Audibert, R. Munos, and C. Szepesvári. Exploration–exploitation tradeoff using variance estimates in multi-armed bandits. *Theoretical Computer Science*, 410(19):1876–1902, 2009.
- [3] S. Boucheron, G. Lugosi, and P. Massart. *Concentration Inequalities: A Nonasymptotic Theory of Independence*. Oxford University Press, 02 2013.
- [4] N. Cesa-Bianchi, T. Cesari, and V. Perchet. Dynamic pricing with finitely many unknown valuations. In A. Garivier and S. Kale, editors, *Algorithmic Learning Theory (ALT)*, 2019.
- [5] M. C. Cohen, I. Lobel, and R. Paes Leme. Feature-based dynamic pricing. *Management Science*, 66(11):4921–4943, 2020.
- [6] J. Fan, Y. Guo, and M. Yu. Policy optimization using semiparametric models for dynamic pricing. *Journal of the American Statistical Association*, 119(545):552–564, 2024.
- [7] D. Foster, A. Rakhlin, D. Simchi-Levi, and Y. Xu. Instance-dependent complexity of contextual bandits and reinforcement learning: A disagreement-based perspective. In *Proceedings of Thirty Fourth Conference on Learning Theory (COLT)*, 2021.
- [8] D. J. Foster, S. M. Kakade, J. Qian, and A. Rakhlin. The statistical complexity of interactive decision making. *arXiv preprint arXiv:2112.13487*, 2021.
- [9] S. Hanneke et al. Theory of disagreement-based active learning. *Foundations and Trends® in Machine Learning*, 7(2-3):131–309, 2014.
- [10] C.-J. Ho, A. Slivkins, and J. W. Vaughan. Adaptive contract design for crowdsourcing markets: Bandit algorithms for repeated principal-agent problems. In *Proceedings of the fifteenth ACM conference on Economics and computation*, pages 359–376, 2014.
- [11] A. Javanmard. Perishability of data: dynamic pricing under varying-coefficient models. *Journal of Machine Learning Research*, 18(53):1–31, 2017.
- [12] A. Javanmard and H. Nazerzadeh. Dynamic pricing in high-dimensions. *Journal of Machine Learning Research*, 20(9):1–49, 2019.
- [13] R. Kleinberg, A. Slivkins, and E. Upfal. Multi-armed bandits in metric spaces. In *Proceedings of the Fortieth Annual ACM Symposium on Theory of Computing*, STOC ’08, page 681–690, New York, NY, USA, 2008. Association for Computing Machinery. ISBN 9781605580470. doi: 10.1145/1374376.1374475. URL <https://doi.org/10.1145/1374376.1374475>.
- [14] R. D. Kleinberg and F. T. Leighton. The value of knowing a demand curve: Bounds on regret for online posted-price auctions. In *Symposium on Foundations of Computer Science (FOCS)*, pages 594–605, 2003.
- [15] A. Krishnamurthy, J. Langford, A. Slivkins, and C. Zhang. Contextual bandits with continuous actions: Smoothing, zooming, and adapting. *Journal of Machine Learning Research*, 21(137): 1–45, 2020.
- [16] A. Krishnamurthy, T. Lykouris, C. Podimata, and R. Schapire. Contextual search in the presence of irrational agents. In *ACM SIGACT Symposium on Theory of Computing (STOC)*, 2021.
- [17] A. Liu, R. P. Leme, and J. Schneider. *Optimal Contextual Pricing and Extensions*. 2021.
- [18] I. Lobel, R. Paes Leme, and A. Vladu. Multidimensional binary search for contextual decision-making. *Operations Research*, 66(5):1346–1361, 2018.
- [19] Y. Luo, W. W. Sun, and Y. Liu. Distribution-free contextual dynamic pricing. *Mathematics of Operations Research*, 49(1):599–618, 2024.
- [20] A. Maurer and M. Pontil. Empirical bernstein bounds and sample variance penalization. *Conference on Learning Theory (COLT)*, 2009.

- 433 [21] R. Paes Leme and J. Schneider. Contextual search via intrinsic volumes. *SIAM Journal on*  
434 *Computing*, 51(4):1096–1125, 2022.
- 435 [22] R. Paes Leme, C. Podimata, and J. Schneider. Corruption-robust contextual search through  
436 density updates. In *Conference on Learning Theory (COLT)*, volume 178, 2022.
- 437 [23] R. Paes Leme, B. Sivan, Y. Teng, and P. Worah. Pricing query complexity of revenue maxi-  
438 mization. In *Proceedings of the 2023 Annual ACM-SIAM Symposium on Discrete Algorithms*  
439 *(SODA)*, pages 399–415. SIAM, 2023.
- 440 [24] C. Podimata and A. Slivkins. Adaptive discretization for adversarial lipschitz bandits. In  
441 *Conference on Learning Theory*, pages 3788–3805. PMLR, 2021.
- 442 [25] S. Shalev-Shwartz and S. Ben-David. *Understanding machine learning: From theory to*  
443 *algorithms*. Cambridge university press, 2014.
- 444 [26] A. Slivkins. Contextual bandits with similarity information. In *Proceedings of the 24th annual*  
445 *Conference On Learning Theory*, pages 679–702. JMLR Workshop and Conference Proceedings,  
446 2011.
- 447 [27] A. Slivkins et al. Introduction to multi-armed bandits. *Foundations and Trends® in Machine*  
448 *Learning*, 12(1-2):1–286, 2019.
- 449 [28] J. Xu and Y.-X. Wang. Towards agnostic feature-based dynamic pricing: Linear policies vs  
450 linear valuation with unknown noise. In *International Conference on Artificial Intelligence and*  
451 *Statistics*, pages 9643–9662. PMLR, 2022.
- 452 [29] T. Zhang. Feel-good thompson sampling for contextual bandits and reinforcement learning.  
453 *SIAM Journal on Mathematics of Data Science*, 4(2):834–857, 2022.
- 454 [30] S. Zuo. Corruption-robust lipschitz contextual search. In C. Vernade and D. Hsu, editors,  
455 *Proceedings of The 35th International Conference on Algorithmic Learning Theory*, volume  
456 237 of *Proceedings of Machine Learning Research*, pages 1234–1254. PMLR, 25–28 Feb 2024.

## NeurIPS Paper Checklist

### 1. Claims

Question: Do the main claims made in the abstract and introduction accurately reflect the paper's contributions and scope?

Answer: [\[Yes\]](#)

Justification: We summarize our key contributions and results, which all have proofs.

Guidelines:

- The answer NA means that the abstract and introduction do not include the claims made in the paper.
- The abstract and/or introduction should clearly state the claims made, including the contributions made in the paper and important assumptions and limitations. A No or NA answer to this question will not be perceived well by the reviewers.
- The claims made should match theoretical and experimental results, and reflect how much the results can be expected to generalize to other settings.
- It is fine to include aspirational goals as motivation as long as it is clear that these goals are not attained by the paper.

### 2. Limitations

Question: Does the paper discuss the limitations of the work performed by the authors?

Answer: [\[NA\]](#)

Justification: This is a theoretical work and we point out all necessary assumptions for the applicability of the results

Guidelines:

- The answer NA means that the paper has no limitation while the answer No means that the paper has limitations, but those are not discussed in the paper.
- The authors are encouraged to create a separate "Limitations" section in their paper.
- The paper should point out any strong assumptions and how robust the results are to violations of these assumptions (e.g., independence assumptions, noiseless settings, model well-specification, asymptotic approximations only holding locally). The authors should reflect on how these assumptions might be violated in practice and what the implications would be.
- The authors should reflect on the scope of the claims made, e.g., if the approach was only tested on a few datasets or with a few runs. In general, empirical results often depend on implicit assumptions, which should be articulated.
- The authors should reflect on the factors that influence the performance of the approach. For example, a facial recognition algorithm may perform poorly when image resolution is low or images are taken in low lighting. Or a speech-to-text system might not be used reliably to provide closed captions for online lectures because it fails to handle technical jargon.
- The authors should discuss the computational efficiency of the proposed algorithms and how they scale with dataset size.
- If applicable, the authors should discuss possible limitations of their approach to address problems of privacy and fairness.
- While the authors might fear that complete honesty about limitations might be used by reviewers as grounds for rejection, a worse outcome might be that reviewers discover limitations that aren't acknowledged in the paper. The authors should use their best judgment and recognize that individual actions in favor of transparency play an important role in developing norms that preserve the integrity of the community. Reviewers will be specifically instructed to not penalize honesty concerning limitations.

### 3. Theory assumptions and proofs

Question: For each theoretical result, does the paper provide the full set of assumptions and a complete (and correct) proof?

Answer: [\[Yes\]](#)

Justification: We provide the full set of assumptions and a complete proof.

Guidelines:

- The answer NA means that the paper does not include theoretical results.
- All the theorems, formulas, and proofs in the paper should be numbered and cross-referenced.
- All assumptions should be clearly stated or referenced in the statement of any theorems.
- The proofs can either appear in the main paper or the supplemental material, but if they appear in the supplemental material, the authors are encouraged to provide a short proof sketch to provide intuition.
- Inversely, any informal proof provided in the core of the paper should be complemented by formal proofs provided in appendix or supplemental material.
- Theorems and Lemmas that the proof relies upon should be properly referenced.

#### 4. Experimental result reproducibility

Question: Does the paper fully disclose all the information needed to reproduce the main experimental results of the paper to the extent that it affects the main claims and/or conclusions of the paper (regardless of whether the code and data are provided or not)?

Answer: [NA]

Justification: The paper does not contain any experimental work.

Guidelines:

- The answer NA means that the paper does not include experiments.
- If the paper includes experiments, a No answer to this question will not be perceived well by the reviewers: Making the paper reproducible is important, regardless of whether the code and data are provided or not.
- If the contribution is a dataset and/or model, the authors should describe the steps taken to make their results reproducible or verifiable.
- Depending on the contribution, reproducibility can be accomplished in various ways. For example, if the contribution is a novel architecture, describing the architecture fully might suffice, or if the contribution is a specific model and empirical evaluation, it may be necessary to either make it possible for others to replicate the model with the same dataset, or provide access to the model. In general, releasing code and data is often one good way to accomplish this, but reproducibility can also be provided via detailed instructions for how to replicate the results, access to a hosted model (e.g., in the case of a large language model), releasing of a model checkpoint, or other means that are appropriate to the research performed.
- While NeurIPS does not require releasing code, the conference does require all submissions to provide some reasonable avenue for reproducibility, which may depend on the nature of the contribution. For example
  - (a) If the contribution is primarily a new algorithm, the paper should make it clear how to reproduce that algorithm.
  - (b) If the contribution is primarily a new model architecture, the paper should describe the architecture clearly and fully.
  - (c) If the contribution is a new model (e.g., a large language model), then there should either be a way to access this model for reproducing the results or a way to reproduce the model (e.g., with an open-source dataset or instructions for how to construct the dataset).
  - (d) We recognize that reproducibility may be tricky in some cases, in which case authors are welcome to describe the particular way they provide for reproducibility. In the case of closed-source models, it may be that access to the model is limited in some way (e.g., to registered users), but it should be possible for other researchers to have some path to reproducing or verifying the results.

#### 5. Open access to data and code

Question: Does the paper provide open access to the data and code, with sufficient instructions to faithfully reproduce the main experimental results, as described in supplemental material?



Answer: [NA]

Justification: The paper does not contain any experimental work.

Guidelines:

- The answer NA means that paper does not include experiments requiring code.
- Please see the NeurIPS code and data submission guidelines (<https://nips.cc/public/guides/CodeSubmissionPolicy>) for more details.
- While we encourage the release of code and data, we understand that this might not be possible, so “No” is an acceptable answer. Papers cannot be rejected simply for not including code, unless this is central to the contribution (e.g., for a new open-source benchmark).
- The instructions should contain the exact command and environment needed to run to reproduce the results. See the NeurIPS code and data submission guidelines (<https://nips.cc/public/guides/CodeSubmissionPolicy>) for more details.
- The authors should provide instructions on data access and preparation, including how to access the raw data, preprocessed data, intermediate data, and generated data, etc.
- The authors should provide scripts to reproduce all experimental results for the new proposed method and baselines. If only a subset of experiments are reproducible, they should state which ones are omitted from the script and why.
- At submission time, to preserve anonymity, the authors should release anonymized versions (if applicable).
- Providing as much information as possible in supplemental material (appended to the paper) is recommended, but including URLs to data and code is permitted.

## 6. Experimental setting/details

Question: Does the paper specify all the training and test details (e.g., data splits, hyper-parameters, how they were chosen, type of optimizer, etc.) necessary to understand the results?

Answer: [NA]

Justification: The paper does not contain any experimental work.

Guidelines:

- The answer NA means that the paper does not include experiments.
- The experimental setting should be presented in the core of the paper to a level of detail that is necessary to appreciate the results and make sense of them.
- The full details can be provided either with the code, in appendix, or as supplemental material.

## 7. Experiment statistical significance

Question: Does the paper report error bars suitably and correctly defined or other appropriate information about the statistical significance of the experiments?

Answer: [NA]

Justification: The paper does not contain any experimental work.

Guidelines:

- The answer NA means that the paper does not include experiments.
- The authors should answer "Yes" if the results are accompanied by error bars, confidence intervals, or statistical significance tests, at least for the experiments that support the main claims of the paper.
- The factors of variability that the error bars are capturing should be clearly stated (for example, train/test split, initialization, random drawing of some parameter, or overall run with given experimental conditions).
- The method for calculating the error bars should be explained (closed form formula, call to a library function, bootstrap, etc.)
- The assumptions made should be given (e.g., Normally distributed errors).
- It should be clear whether the error bar is the standard deviation or the standard error of the mean.

- It is OK to report 1-sigma error bars, but one should state it. The authors should preferably report a 2-sigma error bar than state that they have a 96% CI, if the hypothesis of Normality of errors is not verified.
- For asymmetric distributions, the authors should be careful not to show in tables or figures symmetric error bars that would yield results that are out of range (e.g. negative error rates).
- If error bars are reported in tables or plots, The authors should explain in the text how they were calculated and reference the corresponding figures or tables in the text.

## 8. Experiments compute resources

Question: For each experiment, does the paper provide sufficient information on the computer resources (type of compute workers, memory, time of execution) needed to reproduce the experiments?

Answer: [NA]

Justification: The paper does not contain any experimental work.

Guidelines:

- The answer NA means that the paper does not include experiments.
- The paper should indicate the type of compute workers CPU or GPU, internal cluster, or cloud provider, including relevant memory and storage.
- The paper should provide the amount of compute required for each of the individual experimental runs as well as estimate the total compute.
- The paper should disclose whether the full research project required more compute than the experiments reported in the paper (e.g., preliminary or failed experiments that didn't make it into the paper).

## 9. Code of ethics

Question: Does the research conducted in the paper conform, in every respect, with the NeurIPS Code of Ethics <https://neurips.cc/public/EthicsGuidelines>?

Answer: [Yes]

Justification: We abide by the Code of Ethics.

Guidelines:

- The answer NA means that the authors have not reviewed the NeurIPS Code of Ethics.
- If the authors answer No, they should explain the special circumstances that require a deviation from the Code of Ethics.
- The authors should make sure to preserve anonymity (e.g., if there is a special consideration due to laws or regulations in their jurisdiction).

## 10. Broader impacts

Question: Does the paper discuss both potential positive societal impacts and negative societal impacts of the work performed?

Answer: [NA]

Justification: This is a theoretical work without any clear and immediate social impact.

Guidelines:

- The answer NA means that there is no societal impact of the work performed.
- If the authors answer NA or No, they should explain why their work has no societal impact or why the paper does not address societal impact.
- Examples of negative societal impacts include potential malicious or unintended uses (e.g., disinformation, generating fake profiles, surveillance), fairness considerations (e.g., deployment of technologies that could make decisions that unfairly impact specific groups), privacy considerations, and security considerations.
- The conference expects that many papers will be foundational research and not tied to particular applications, let alone deployments. However, if there is a direct path to any negative applications, the authors should point it out. For example, it is legitimate to point out that an improvement in the quality of generative models could be used to

generate deepfakes for disinformation. On the other hand, it is not needed to point out that a generic algorithm for optimizing neural networks could enable people to train models that generate Deepfakes faster.

- The authors should consider possible harms that could arise when the technology is being used as intended and functioning correctly, harms that could arise when the technology is being used as intended but gives incorrect results, and harms following from (intentional or unintentional) misuse of the technology.
- If there are negative societal impacts, the authors could also discuss possible mitigation strategies (e.g., gated release of models, providing defenses in addition to attacks, mechanisms for monitoring misuse, mechanisms to monitor how a system learns from feedback over time, improving the efficiency and accessibility of ML).

## 11. Safeguards

Question: Does the paper describe safeguards that have been put in place for responsible release of data or models that have a high risk for misuse (e.g., pretrained language models, image generators, or scraped datasets)?

Answer: [NA]

Justification: The paper poses no such risks.

Guidelines:

- The answer NA means that the paper poses no such risks.
- Released models that have a high risk for misuse or dual-use should be released with necessary safeguards to allow for controlled use of the model, for example by requiring that users adhere to usage guidelines or restrictions to access the model or implementing safety filters.
- Datasets that have been scraped from the Internet could pose safety risks. The authors should describe how they avoided releasing unsafe images.
- We recognize that providing effective safeguards is challenging, and many papers do not require this, but we encourage authors to take this into account and make a best faith effort.

## 12. Licenses for existing assets

Question: Are the creators or original owners of assets (e.g., code, data, models), used in the paper, properly credited and are the license and terms of use explicitly mentioned and properly respected?

Answer: [NA]

Justification: The paper does not use existing assets.

Guidelines:

- The answer NA means that the paper does not use existing assets.
- The authors should cite the original paper that produced the code package or dataset.
- The authors should state which version of the asset is used and, if possible, include a URL.
- The name of the license (e.g., CC-BY 4.0) should be included for each asset.
- For scraped data from a particular source (e.g., website), the copyright and terms of service of that source should be provided.
- If assets are released, the license, copyright information, and terms of use in the package should be provided. For popular datasets, [paperswithcode.com/datasets](https://paperswithcode.com/datasets) has curated licenses for some datasets. Their licensing guide can help determine the license of a dataset.
- For existing datasets that are re-packaged, both the original license and the license of the derived asset (if it has changed) should be provided.
- If this information is not available online, the authors are encouraged to reach out to the asset's creators.

## 13. New assets

Question: Are new assets introduced in the paper well documented and is the documentation provided alongside the assets?

719 Answer: [NA]  
 720 Justification: The paper does not release new assets.  
 721 Guidelines:  
 722 • The answer NA means that the paper does not release new assets.  
 723 • Researchers should communicate the details of the dataset/code/model as part of their  
 724 submissions via structured templates. This includes details about training, license,  
 725 limitations, etc.  
 726 • The paper should discuss whether and how consent was obtained from people whose  
 727 asset is used.  
 728 • At submission time, remember to anonymize your assets (if applicable). You can either  
 729 create an anonymized URL or include an anonymized zip file.

730 **14. Crowdsourcing and research with human subjects**  
 731 Question: For crowdsourcing experiments and research with human subjects, does the paper  
 732 include the full text of instructions given to participants and screenshots, if applicable, as  
 733 well as details about compensation (if any)?  
 734 Answer: [NA]  
 735 Justification: The paper does not release new assets  
 736 Guidelines:  
 737 • The answer NA means that the paper does not involve crowdsourcing nor research with  
 738 human subjects.  
 739 • Including this information in the supplemental material is fine, but if the main contribu-  
 740 tion of the paper involves human subjects, then as much detail as possible should be  
 741 included in the main paper.  
 742 • According to the NeurIPS Code of Ethics, workers involved in data collection, curation,  
 743 or other labor should be paid at least the minimum wage in the country of the data  
 744 collector.

745 **15. Institutional review board (IRB) approvals or equivalent for research with human**  
 746 **subjects**  
 747 Question: Does the paper describe potential risks incurred by study participants, whether  
 748 such risks were disclosed to the subjects, and whether Institutional Review Board (IRB)  
 749 approvals (or an equivalent approval/review based on the requirements of your country or  
 750 institution) were obtained?  
 751 Answer: [NA]  
 752 Justification: The paper does not involve crowdsourcing nor research with human subjects.  
 753 Guidelines:  
 754 • The answer NA means that the paper does not involve crowdsourcing nor research with  
 755 human subjects.  
 756 • Depending on the country in which research is conducted, IRB approval (or equivalent)  
 757 may be required for any human subjects research. If you obtained IRB approval, you  
 758 should clearly state this in the paper.  
 759 • We recognize that the procedures for this may vary significantly between institutions  
 760 and locations, and we expect authors to adhere to the NeurIPS Code of Ethics and the  
 761 guidelines for their institution.  
 762 • For initial submissions, do not include any information that would break anonymity (if  
 763 applicable), such as the institution conducting the review.

764 **16. Declaration of LLM usage**  
 765 Question: Does the paper describe the usage of LLMs if it is an important, original, or  
 766 non-standard component of the core methods in this research? Note that if the LLM is used  
 767 only for writing, editing, or formatting purposes and does not impact the core methodology,  
 768 scientific rigorousness, or originality of the research, declaration is not required.  
 769 Answer: [NA]

770 Justification: The core method development in this research does not involve LLMs as any  
771 important, original, or non-standard components.  
772 Guidelines:  
773 • The answer NA means that the core method development in this research does not  
774 involve LLMs as any important, original, or non-standard components.  
775 • Please refer to our LLM policy (<https://neurips.cc/Conferences/2025/LLM>)  
776 for what should or should not be described.



# Supplementary material for Contextual Dynamic Pricing with Heterogeneous Buyers

## A Extended Discussion on Related Work

Our work relates closely to three lines of work outlined below.

**(I) Contextual pricing/search.** The closest line to our work is *contextual pricing/search*. In contextual search, there is a repeated interaction between a learner and nature, where the learner is trying to learn a hidden vector  $\theta^* \in \mathbb{R}^d$  over time while receiving only single-bit feedback. Mathematically, at each round  $t \in [T]$ , the learner receives a (potentially adversarially chosen) context  $u_t \in \mathbb{R}^d$  and decides to query  $y_t \in \mathbb{R}$ . The learner receives feedback  $\sigma_t = \text{sgn}(\langle u_t, \theta^* \rangle - y_t) \in \{-1, +1\}$  and incurs loss  $\ell_t(y_t, \langle u_t, \theta^* \rangle)$  [5]. The learner does *not* observe  $\ell_t(y_t, \langle u_t, \theta^* \rangle)$ ; only the binary feedback  $\sigma_t$ . Under this framework, contextual *pricing* corresponds to the case where the buyer population is *homogeneous* and the loss function  $\ell_t$  corresponds to the lost revenue as a result of posting price  $y_t$  (aka the “pricing loss”). Contextual search works have also considered two other loss functions: the symmetric/absolute loss  $\ell_t(y_t, \langle u_t, \theta^* \rangle) := |y_t - \langle u_t, \theta^* \rangle|$ ; and the  $\varepsilon$ -ball loss  $\ell_t(y_t, \langle u_t, \theta^* \rangle) = \mathbb{1}\{|y_t - \langle u_t, \theta^* \rangle| > \varepsilon\}$ , which are motivated by settings other than the pricing one.

There have been two approaches in the literature for learning in contextual pricing and contextual search (for homogeneous agents/buyers). The first approach (e.g., [5, 18, 21, 17]) employs a version of multidimensional binary search: specifically, the algorithms maintain a “knowledge set” with all the possible values of  $\theta^*$  which are “consistent” with the feedback that nature has given thus far. Similar to traditional binary search, the query point is chosen to be the point that (given the nature’s feedback) will eliminate roughly half of the current knowledge set. As the knowledge set shrinks, the learner ends up with a small knowledge set for the possible values of  $\theta^*$ ; this is enough to guarantee sublinear regret. The series of works in [5, 18, 21, 17] optimized regret bounds for the three different loss functions (i.e., symmetric,  $\varepsilon$ -ball, and pricing). The specific algorithms were different at each paper, but they all maintained this “binary search” flavor. Most of the algorithms employing a multidimensional binary search approach can be “robustified” to very little noise in the agents’ responses; since the learner will irrevocably shrink the knowledge set according to the feedback received from nature, they can only afford very few mistakes.

The second approach (e.g., [12, 11, 6, 19]) focuses exclusively on pricing settings. This approach uses regression-based algorithms for learning the correct price and *needs to assume* stochastic noise in the buyers’ responses. There have also been works studying other aspects of contextual pricing (e.g., strategic agents [1] and unknown noise distribution [28]). Apart from the methodological differences with our work, both streams of literature focus on a *homogeneous* agent population and cannot be readily adapted for a *heterogeneous* population setting.

Moving closer to the heterogeneous agents problem, Krishnamurthy et al. [16] studied “corruption-robust” contextual search, where the agent population is mostly homogeneous, except for  $C = o(T)$  corrupted agent responses. Their regret bounds were subsequently strengthened in [22], but the latter only works for contextual search with absolute and  $\varepsilon$ -ball loss (i.e., does *not* cover the pricing loss). This model has been also studied with a Lipschitz target function [30]. Learning with corruptions can be seen as a first step towards learning from heterogeneous agents, but the approaches above do not scale appropriately for truly heterogeneous agent populations. In contrast, we focus on *fully heterogeneous* settings, where we do not constrain the number or the size of the different buyer types.

**(II) Non-contextual pricing.** The special case  $d = 1$  was introduced by [14], who studied non-contextual dynamic pricing for a homogeneous, stochastic, and adversarial buyer population. For the adversarial buyer population, the authors assumed that there can be  $T$  different valuations and showed tight regret bounds of  $\tilde{O}(T^{2/3})$ . In contrast, in our setting, we assume that users are “clustered” in  $K_*$  types), and so the lower bound of  $\Omega(T^{2/3})$  of Kleinberg and Leighton [14] does not apply.

The closest to our work is the work of [4], who consider pricing a heterogeneous agent population with an unknown number of types, but the types are still limited to be less than  $o(T)$ . Throughout the paper, we discuss how their bounds relate to ours for the special case of  $d = 1$ . None of the aforementioned techniques readily generalize to contextual pricing settings.

(III) **Lipschitz bandits.** Finally, our work is related to the literature on Lipschitz bandits. Although the pricing loss is *not* fully Lipschitz, it has recently been observed that it satisfies a *one-sided Lipschitzness*. This allows us to leverage techniques from adaptive discretization [13] to obtain improved bounds for  $d = 1$ . Zooming had previously been applied to pricing (see, e.g., [24]), but these algorithms are insufficient for the  $K_\star$ -types setting. Indeed, their performance scales with a zooming dimension  $\text{ZoomDim}$  that is too large here. Our ZoomV uses variance-aware confidence intervals so that its performance scales with a smaller, variance-aware zooming dimension  $\text{ZoomDimV}$ . Finally, [15] consider contextual bandits with continuous action spaces, which encompasses the setting of this work. Their regret bounds cover the setting where, for a fixed context, the expected reward is Lipschitz in the learner's action. Although their analysis can be adapted to the one-sided Lipschitz setting of contextual pricing, their results either require stochastic contexts or incur large regret due to naïve discretization. Even in the stochastic case, their regret bound scales with a policy zooming coefficient which does not appear to admit a useful bound in terms of  $K_\star$ .

## 841 B Proofs for Section 2

### 842 B.1 Proof of Lemma 2.1

843 We simply bound  $\text{rev}_Q(p') - \text{rev}_Q(p) = p' \text{dem}_Q(p') - p \text{dem}_Q(p) \leq \text{dem}_Q(p)(p' - p) \leq p' - p$ ,  
844 using monotonicity of demand functions.  $\square$

### 845 B.2 Proof of Lemma 2.2

846 By the definition of  $d_L$ , it suffices to prove the lemma when  $d = 1$ . The first revenue lower bound  
847 holds by Lemma 2.1. For the second, omitting the context  $u$  and writing  $[x]_+ = \max\{x, 0\}$ , we use  
848 the Lévy metric guarantee to bound

$$\begin{aligned}
\text{rev}_{D'}(\pi) &= [\text{br}_D - \varepsilon]_+ \text{dem}_{D'}([\text{br}_D - \varepsilon]_+) \\
&\geq [\text{br}_D - \varepsilon]_+ \text{dem}_{D'}(\text{br}_D - \varepsilon) && \text{(demand equals 1 for } p \leq 0) \\
&\geq [\text{br}_D - \varepsilon]_+ (\text{dem}_D(\text{br}_D - 2\varepsilon) - \varepsilon) && (d_L \text{ bound}) \\
&\geq [\text{br}_D - \varepsilon]_+ (\text{dem}_D(\text{br}_D) - \varepsilon) && \text{(monotonicity of } \text{dem}_D) \\
&\geq \text{rev}_D(\text{br}_D) - 2\varepsilon \\
&\geq \text{rev}_D(\text{br}_{D'}) - 2\varepsilon && (\text{br}_D \text{ maximizes } \text{rev}_D) \\
&= \text{br}_{D'} \text{dem}_D(\text{br}_{D'}) - 2\varepsilon \\
&\geq \text{br}_{D'} (\text{dem}_{D'}(\text{br}_{D'} - \varepsilon) - \varepsilon) - 2\varepsilon && (d_L \text{ bound}) \\
&\geq \text{br}_{D'} \text{dem}_{D'}(\text{br}_{D'}) - 3\varepsilon \\
&= \text{rev}_{D'}(\text{br}_{D'}) - 3\varepsilon,
\end{aligned}$$

849 as desired.  $\square$

## 850 C Proofs for Section 3

851 To unify analysis of Sections 3.1 and 3.2, we introduce a more general problem setup and algorithm.

### 852 C.1 Generalized Problem Setup

853 To start, we replace the price set  $[0, 1]$  with a subset  $\mathcal{P} \subseteq [0, 1]$ , which will remain  $[0, 1]$  in Section 3.1  
854 but will be restricted to a finite set for Section 3.2. Then, instead of selecting a type distribution  $D_\star$ ,  
855 we have the adversary choose a demand function  $f^\star$  which maps price  $p \in \mathcal{P}$  and context  $u \in \mathcal{U}$  to  
856 a purchase probability  $f^\star(p, u) \in [0, 1]$ . Then, at round  $t$ , if the adversary selects context  $u_t \in \mathcal{U}$   
857 and the learner posts price  $p_t \in \mathcal{P}$ , purchase decision  $y_t \in \{0, 1\}$  is sampled independently from  
858  $\text{Ber}(f^\star(p_t, u_t))$ . This abstracts away our previous notions of buyer types and values and will also  
859 model the smoothed environment of Section 3.2. We impose the corresponding notion of realizability.

860 **Setting C.1** (realizability, general). Under the setup described above, the demand function  $f^\star$  belongs to  
861 a known, finite class  $\mathcal{F}$  of measurable functions from  $\mathcal{P} \times \mathcal{U}$  to  $[0, 1]$ .

Often, we shall fix a context and consider univariate (non-contextual) demand functions. Given a univariate demand function  $g : [0, 1] \rightarrow [0, 1]$ , we define the corresponding revenue function  $\text{rev}_g(p) = p \cdot g(p)$ , best-response  $\text{br}_g = \arg \max_{p \in \mathcal{P}} \text{rev}_g$  (breaking ties arbitrarily), and gap  $\text{gap}_g(p) = \text{rev}_g(\text{br}_g) - \text{rev}_g(p)$ . For a contextual demand function  $f : [0, 1] \times \mathcal{U} \rightarrow [0, 1]$  and a context  $u \in \mathcal{U}$ , write  $\text{proj}(f, u)$  for the induced univariate demand function  $p \mapsto f(p, u)$ . We define  $\text{rev}_f(p, u) = \text{rev}_{\text{proj}(f, u)}(p)$ ,  $\text{br}_f(u) = \text{br}_{\text{proj}(f, u)}$ ,  $\text{gap}_f(p, u) = \text{gap}_{\text{proj}(f, u)}(p)$ , and  $\text{proj}(\mathcal{F}, u) := \{\text{proj}(f, u) : f \in \mathcal{F}\}$ , along with  $\text{rev}_* := \text{rev}_{f^*}$ ,  $\text{br}_* := \text{br}_{f^*}$ , and  $\text{gap}_* := \text{gap}_{f^*}$ . Finally, we define

$$\text{dis}(\mathcal{F}, f_*) := \sup_{u \in \mathcal{U}} \text{dis}(\{\text{proj}(f, u) : f \in \mathcal{F}\}, f_*),$$

generalizing the definition in Section 3.1. Regret is defined as the sum of gaps  $\sum_{t=1}^T \text{gap}_*(p_t, u_t)$ .

## C.2 Generalized OPS and its Regret Guarantee

We now present an extension of OPS and POPS to the generalized setup of Appendix C.1. Both can be recovered for appropriate choices of  $\mathcal{F}$  and  $\mathcal{P}$ , which we will discuss later. First, for a univariate demand function  $g : \mathcal{P} \rightarrow [0, 1]$ , price  $p$ , and purchase decision  $y$ , we define loss

$$\ell_\lambda(g, p, y) := (g(p) - y)^2 - \lambda \text{rev}_g(\text{br}_g). \quad (3)$$

We now adapt OPS to this setting, introducing GOPS (Algorithm 3).

---

### ALGORITHM 3: GOPS: Generalized OPS for Contextual Pricing with Finite Model Class

---

1 **Input:** finite demand function class  $\mathcal{F}$ , model prior  $\mu_1 \in \Delta(\mathcal{F})$ , optimism strength  $\lambda > 0$ ;  
2 **for** each round  $t \in [T]$  **do**  
3     observe context  $u_t$ ;  
4     sample demand function  $f_t \sim \mu_t$ ;  
5     play  $p_t = \text{br}_{f_t}(u_t)$  and observe  $y_t$ ;  
6     update  $\mu_{t+1}(f) \propto \mu_t(f) \exp(-\ell_\lambda(\text{proj}(f, u_t), p_t, y_t))$  for each  $f \in \mathcal{F}$ ;

---

We prove the following regret bound.

**Lemma C.2.** *Under Setting C.1, with model prior  $\mu_1 \in \Delta(\mathcal{F})$  and optimism strength  $\lambda \geq 4/T$ , GOPS (Algorithm 3) achieves regret  $25\lambda(\text{dis}(\mathcal{F}, f_*) \vee 1)T \log^2(T) + \log(1/\mu_1(f_*))/\lambda$ .*

Our proof employs the following decoupling lemma.

**Lemma C.3 (8).** *Let  $\mathcal{G}$  be a finite family of univariate demand functions and fix  $g^* \in \mathcal{G}$ . Then, for any  $\nu \in \Delta(\mathcal{G})$  and  $\gamma > 0$ , we have*

$$\mathbb{E}_{g \sim \nu} [|g(\text{br}_g) - g^*(\text{br}_g)|] \leq 6 \frac{\text{dis}(\mathcal{G}) \log^2(\gamma \vee e)}{\gamma} + \gamma \mathbb{E}_{\tilde{g}, g \sim \nu} [(\tilde{g}(\text{br}_g) - g^*(\text{br}_g))^2].$$

This is simply Lemma E.2 of [8] with function class  $\{g - g^* : g \in \mathcal{G}\}$  and  $\Delta \rightarrow 0$ . In our proof,  $\mathcal{G}$  and  $g^*$  will be the projections of  $\mathcal{F}$  and  $f^*$  onto a fixed context  $u \in \mathcal{U}$ .

The remainder of our analysis is a slight modification to that of [29], which we provide for completeness. For each round  $t \in [T]$  of OPS, we adopt the following notation:

- history up to round  $t$ :  $S_t := \{u_\tau, f_\tau, p_\tau, y_\tau\}_{\tau=1}^t$ ,
- true univariate demand function:  $g_t^* := \text{proj}(f^*, u_t)$ ,
- univariate demand function posterior:  $\nu_t := \text{proj}(\mu_t, u_t) := \text{Law}_{f \sim \mu_t}(\text{proj}(f, u_t))$ ,
- sampled univariate demand function:  $g_t := \text{proj}(f_t, u_t)$ , so that  $p_t = \text{br}_{g_t}$ ,
- independently sampled univariate demand function (for analysis):  $\tilde{g}_t \sim \nu_t$ ,
- regret:  $\text{REG}_t := \text{rev}_*(\text{br}_*(u_t), u_t) - \text{rev}_*(p_t, u_t) = \text{rev}_{g_t^*}(p_t) - \text{rev}_{g_t^*}(p_t)$ ,
- least-squares errors:  $\text{LS}_t(g) := (g(p_t) - g^*(p_t))^2$ ,
- “feel-good” (optimism) bonuses:  $\text{FG}_t(g) := \text{rev}_g(\text{br}_g) - \text{rev}_{g_t^*}(\text{br}_{g_t^*})$ ,

- loss discrepancies:  $\Delta L_t(g) := \ell_\lambda(g, p_t, y_t) - \ell_\lambda(g_t^*, p_t, y_t)$ ,
- potential function:  $Z_t := \mathbb{E}_{S_t} \log \mathbb{E}_{f \sim \text{Unif}(\mathcal{F})} \exp(-\sum_{\tau=1}^t \Delta L_t(\text{proj}(f, u_t)))$ .

Our proof requires several supporting lemmas. The first is a basic concentration result.

**Lemma C.4.** For  $c \geq 0$  and a random variable  $X$  supported on  $[0, 1]$ , we have  $\log \mathbb{E} \exp(-cX) \leq (\frac{1}{2}c^2 - c) \mathbb{E} X$ . For  $X$  supported on  $[a, b]$ , we have  $\log \mathbb{E} \exp(cX) \leq c \mathbb{E} X + \frac{1}{8}(b-a)^2 c^2$ .

*Proof.* For the first inequality, we bound

$$\log \mathbb{E} \exp(-cX) \leq \mathbb{E}[\exp(-cX) - 1] \leq \mathbb{E}[-cX + \frac{1}{2}c^2 X^2] \leq \mathbb{E}[-cX + \frac{1}{2}c^2 X] = (\frac{1}{2}c^2 - c) \mathbb{E} X.$$

The second inequality is exactly Hoeffding's lemma.  $\square$

The next lemma mirrors Lemma 4 of [29]. This is a consequence of the definition of  $\Delta L_t$  and the sub-Gaussianity of its components.

**Lemma C.5.** For round  $t$  of GOPS (Algorithm 3), we have

$$\log \mathbb{E}_{g \sim \nu_t} \mathbb{E}_{y_t | u_t, p_t} \exp(-\Delta L_t(g)) \leq -\frac{1}{4} \mathbb{E}_{g \sim \nu_t} \text{LS}_t(g) + \lambda \mathbb{E}_{g \sim \nu_t} \text{FG}_t(g) + \frac{3}{2} \lambda^2.$$

We note that this lemma does not rely on how  $p_t$  is selected.

*Proof.* Let  $g \sim \nu_t$  and  $y \sim \text{Law}(y_t | u_t, p_t) = \text{Ber}(g_t(p_t))$  be independent. Let  $\varepsilon = y - g_t^*(p_t)$  denote the discrepancy between the observed and expected demand. Since demands lie in  $[0, 1]$ , Lemma C.4 with  $X = \varepsilon$  gives

$$\mathbb{E}_y \exp(-2\varepsilon(g_t^*(p_t) - g(p_t))) \leq \exp(\frac{1}{2}(g_t^*(p_t) - g(p_t))^2) = \exp(\frac{1}{2} \text{LS}_t(g)). \quad (4)$$

Moreover, we have

$$\begin{aligned} -\Delta L_t(g) &= -(\varepsilon + g_t^*(p_t) - g(p_t))^2 + \varepsilon^2 + \lambda \text{FG}_t(g) \\ &= -2\varepsilon(g_t^*(p_t) - g(p_t)) - \text{LS}_t(g) + \lambda \text{FG}_t(g). \end{aligned}$$

Combining with (4) gives

$$\mathbb{E}_y \exp(-\Delta L_t(g)) \leq \exp(-\frac{1}{2} \text{LS}_t(g) + \lambda \text{FG}_t(g)).$$

Therefore, we have

$$\begin{aligned} \log \mathbb{E}_{g, y} \exp(-\Delta L_t(g)) &\leq \log \mathbb{E}_g \exp(-\frac{1}{2} \text{LS}_t(g) + \lambda \text{FG}_t(g)) \\ &\leq \frac{2}{3} \log \mathbb{E}_g \exp(-\frac{3}{4} \text{LS}_t(g)) + \frac{1}{3} \log \mathbb{E}_g \exp(3\lambda \text{FG}_t(g)), \end{aligned}$$

where the last inequality follows by Hölder's inequality. For the first term, we use Lemma C.4 with  $X = \text{LS}_t(g)$  and  $c = \frac{3}{4}$  to bound

$$\frac{2}{3} \log \left( \mathbb{E}_g \exp(-\frac{3}{4} \text{LS}_t(g)) \right) \leq \frac{2}{3} \left( \frac{1}{2} c^2 - c \right) \mathbb{E}_g \text{LS}_t(g) = -\frac{5}{16} \mathbb{E}_g \text{LS}_t(g).$$

For the second term, we apply the lemma with  $X = \text{FG}_t(g)$  and  $c = 3\lambda$  to obtain

$$\frac{1}{3} \log \mathbb{E}_g \exp(3\lambda \text{FG}_t(g)) \leq \lambda \mathbb{E}_g \text{FG}_t(g) + \frac{3}{2} \lambda^2.$$

Combining, we have

$$\log \mathbb{E}_{g, y} \exp(-\Delta L_t(g)) \leq -\frac{5}{16} \mathbb{E}_g \text{LS}_t(g) + \lambda \mathbb{E}_g \text{FG}_t(g) + \frac{3}{2} \lambda^2,$$

implying the lemma.  $\square$

Our last helper lemma mirrors Lemma 5 of [29].

917 **Lemma C.6.** For round  $t$  of GOPS (Algorithm 3), we have

$$\frac{1}{4\lambda} \mathbb{E} \text{LS}_t(\tilde{g}_t) - \mathbb{E} \text{FG}_t(g_t) \leq \frac{3}{2}\lambda + \frac{1}{\lambda}(Z_{t-1} - Z_t).$$

918 This lemma also does not rely on how prices are chosen.

919 *Proof.* Recall that  $\mu_1 = \text{Unif}(\mathcal{F})$ . Defining  $W_t(f \mid S_t) := \exp(-\sum_{\tau=1}^t \Delta L_\tau(\text{proj}(f, u_\tau)))$ , we  
 920 have  $Z_t = \mathbb{E}_{S_t} \log \mathbb{E}_{f \sim \mu_1} W_t(f \mid S_t)$ . Note that

$$\mu_t(f) = \frac{W_{t-1}(f \mid S_{t-1})}{\mathbb{E}_{f \sim \mu_1} W_{t-1}(f \mid S_{t-1})} \mu_1(f).$$

921 We then bound

$$\begin{aligned} Z_t &= Z_{t-1} + \mathbb{E}_{S_t} \log \frac{\mathbb{E}_{f \sim \mu_1} W_t(f \mid S_t)}{\mathbb{E}_{f \sim \mu_1} W_{t-1}(f \mid S_{t-1})} \\ &= Z_{t-1} + \mathbb{E}_{S_t} \log \frac{\mathbb{E}_{f \sim \mu_1} W_{t-1}(f \mid S_{t-1}) \exp(-\Delta L_t(\text{proj}(f, u_t)))}{\mathbb{E}_{f \sim \mu_1} W_{t-1}(f \mid S_{t-1})} \\ &= Z_{t-1} + \mathbb{E}_{S_t} \log \mathbb{E}_{f \sim \mu_t} \exp(-\Delta L_t(\text{proj}(f, u_t))) \\ &\stackrel{(a)}{\leq} Z_{t-1} + \mathbb{E}_{S_{t-1}, u_t, p_t} \log \mathbb{E}_{y_t \mid u_t, p_t} \mathbb{E}_{g \sim \nu_t} \exp(-\Delta L_t(g)) \\ &\stackrel{(b)}{\leq} Z_{t-1} - \frac{1}{4} \mathbb{E} \text{LS}_t(\tilde{g}_t) + \lambda \mathbb{E} \text{FG}_t(g_t) + \frac{3}{2}\lambda^2, \end{aligned}$$

922 where (a) uses Jensen's inequality and (b) uses Lemma C.4. Rearranging gives the lemma.  $\square$

923 Now, we return to Lemma C.2, where we will finally incorporate our price selection rule and the  
 924 decoupling lemma.

925 **Proof of Lemma C.2** For each round  $t \in [T]$ , we recall that  $p_t = \text{br}_{g_t}$  and decompose

$$\begin{aligned} \text{REG}_t &= \text{rev}_{g_t^*}(\text{br}_{g_t^*}) - \text{rev}_{g_t^*}(p_t) \\ &= [\text{rev}_{g_t}(p_t) - \text{rev}_{g_t^*}(p_t)] - [\text{rev}_{g_t}(\text{br}_{g_t}) - \text{rev}_{g_t^*}(\text{br}_{g_t^*})] \\ &= [\text{rev}_{g_t}(p_t) - \text{rev}_{g_t^*}(p_t)] - \text{FG}_t(g_t). \end{aligned}$$

926 Conditioning on  $S_{t-1}$  and  $u_t$ , we bound with Lemma C.3 using  $\gamma = \frac{1}{4\lambda}$

$$\begin{aligned} \mathbb{E}[\text{rev}_{g_t}(p_t) - \text{rev}_{g_t^*}(p_t) \mid S_{t-1}, u_t] &= \mathbb{E}_{g \sim \nu_t} [\text{rev}_g(\text{br}_g) - \text{rev}_{g_t^*}(\text{br}_g)] \\ &\leq \mathbb{E}_{g \sim \nu_t} [|g(\text{br}_g) - g_t^*(\text{br}_g)|] \\ &\leq 24\lambda \text{dis}(\mathcal{F}, f_\star) \log^2(4\lambda^{-1} \vee e) + \frac{1}{4\lambda} \mathbb{E}_{\tilde{g}, g \sim \nu} [(\tilde{g}(\text{br}_g) - g_t^*(\text{br}_g))^2] \\ &= 24\lambda \text{dis}(\mathcal{F}, f_\star) \log^2(4\lambda^{-1} \vee e) + \frac{1}{4\lambda} \mathbb{E}[\text{LS}_t(\tilde{g}_t) \mid S_{t-1}, u_t]. \end{aligned}$$

927 Taking expectations over  $S_{t-1}$  and  $u_t$ , we bound

$$\begin{aligned} \mathbb{E} \text{REG}_t &\leq 24\lambda \text{dis}(\mathcal{F}, f_\star) \log^2(4\lambda^{-1} \vee e) + \frac{1}{4\lambda} \mathbb{E} \text{LS}_t(\tilde{g}_t) - \mathbb{E} \text{FG}_t(g_t) \\ &\leq 24\lambda \text{dis}(\mathcal{F}, f_\star) \log^2(4\lambda^{-1} \vee e) + \frac{3}{2}\lambda + \frac{1}{\lambda}(Z_{t-1} - Z_t), \end{aligned}$$

928 using Lemma C.6. Summing over  $t \in [T]$  and noting that  $Z_0 = 0$ , we bound

$$\mathbb{E}[R(T)] \leq T \left( 24\lambda \text{dis}(\mathcal{F}, f_\star) \log^2(4\lambda^{-1} \vee e) + \frac{3}{2}\lambda \right) - \frac{1}{\lambda} Z_T.$$



Moreover, by realizability, we have

$$Z_T \geq \mathbb{E}_{S_t} \log(\mu_1(f^*) W_T(f^* | S_t)) = \log(\mu_1(f^*)).$$

Combining, we obtain

$$\begin{aligned} \mathbb{E}[R(T)] &\leq T \left( 24\lambda \text{dis}(\mathcal{F}, f_*) \log^2(4\lambda^{-1} \vee e) + \frac{3}{2}\lambda \right) - \frac{\log(\mu_1(f_*))}{\lambda} \\ &\leq T(25\lambda(\text{dis}(\mathcal{F}, f_*) \vee 1) \log^2(4\lambda^{-1} \vee e)) - \frac{\log(\mu_1(f_*))}{\lambda}, \\ &\leq T(25\lambda(\text{dis}(\mathcal{F}, f_*) \vee 1) \log^2 T) - \frac{\log(\mu_1(f_*))}{\lambda}, \end{aligned}$$

as desired.  $\square$

### C.3 Proof of Lemma 3.3

Under the general setup of Appendix C.1, we take  $\mathcal{F}$  to be the class of demand functions induced by  $\mathcal{D}$ , set  $\mathcal{P} = [0, 1]$ , and fix  $\mu_1 = \text{Unif}(\mathcal{F})$ . By these choices, GOPS coincides exactly with OPS, as does our notion of regret. Thus, Lemma C.2 gives the desired regret bound of

$$T(25\lambda(\text{dis}(\mathcal{D}, D_*) \vee 1) \log^2 T) - \frac{\log(\mu_1(D_*))}{\lambda} = \tilde{O}(\lambda T \text{dis}(\mathcal{D}, D_*) + \log(|\mathcal{D}|)/\lambda). \quad \square$$

### C.4 Proof of Lemma 3.4

Fixing  $f \in \mathcal{F}$ ,  $\nu \in \Delta([0, 1])$ , and  $p \in [0, 1]$ , suppose that  $\mathbb{E}_{q \sim \nu}[f(q)^2] \leq \varepsilon^2$  and  $|f(p)| > \delta$ . If  $f(p) > \delta$ , then  $f(q) > \delta$  for all  $q \leq p$  by monotonicity. Thus,  $\mathbb{P}_{q \sim \nu}(q \leq p) \delta^2 \leq \mathbb{E}_{q \sim \nu}[f(q)^2] \leq \varepsilon^2$ . Otherwise, if  $f(p) < -\delta$ , we analogously have  $\mathbb{P}_{q \sim \nu}(q \geq p) \delta^2 \leq \mathbb{E}_{q \sim \nu}[f(q)^2] \leq \varepsilon^2$ . Thus, for  $\nu \in \Delta(\mathcal{X})$ , we have

$$\begin{aligned} &\mathbb{P}_{p \sim \nu}(\exists f \in \mathcal{F} : \mathbb{E}_{q \sim \nu}[f(q)^2] \leq \varepsilon^2 \wedge |f(p)| > \delta) \\ &\leq \mathbb{P}_{p \sim \nu} \left( \mathbb{P}_{q \sim \nu}(q \leq p) \leq \frac{\varepsilon^2}{\delta^2} \vee \mathbb{P}_{q \sim \nu}(q \geq p) \leq \frac{\varepsilon^2}{\delta^2} \right) \\ &\leq \mathbb{P}_{p \sim \nu} \left( \mathbb{P}_{q \sim \nu}(q \leq p) \leq \frac{\varepsilon^2}{\delta^2} \right) + \mathbb{P}_{p \sim \nu} \left( \mathbb{P}_{q \sim \nu}(q \geq p) \leq \frac{\varepsilon^2}{\delta^2} \right) \\ &\leq 2 \frac{\varepsilon^2}{\delta^2}. \end{aligned}$$

Plugging this into the definition of  $\text{dis}$  finishes the proof.  $\square$

### C.5 Proof of Lemma 3.5

For any distribution  $\nu \in \Delta(\mathcal{Z})$ , write  $\nu_i = h_i \circ \nu|_{\mathcal{Z}_i}$  for law of  $h_i(p)$  when  $p \sim \nu$ , conditioned on  $p \in \mathcal{Z}_i$ , and let  $\mu_\nu(i) = \mathbb{P}_{p \sim \nu}(p \in \mathcal{Z}_i)$ . We then bound

$$\begin{aligned} \text{dis}(\mathcal{G}) &= \sup_{\varepsilon, \delta > 0} \sup_{\nu \in \mathcal{P}(\mathcal{Z})} \mathbb{E}_{i \sim \mu_\nu} \frac{\delta^2}{\varepsilon^2} \mathbb{P}_{p \sim \nu|_{\mathcal{Z}_i}} \left( \exists g \in \mathcal{G} : \mathbb{E}_{q \sim \nu} [g(q)^2] \leq \varepsilon^2 \wedge |g(p)| > \delta \right) \\ &\leq \sup_{\varepsilon, \delta > 0} \sup_{\nu \in \mathcal{P}(\mathcal{Z})} \mathbb{E}_{i \sim \mu_\nu} \frac{\delta^2}{\varepsilon^2} \mathbb{P}_{p \sim \nu_i} \left( \exists f \in \mathcal{F} : \mu_\nu(i) \mathbb{E}_{q \sim \nu_i} [f(q)^2] \leq \varepsilon^2 \wedge |f(p)| > \delta \right) \\ &\leq \sup_{\varepsilon, \delta > 0} \sup_{\nu \in \mathcal{P}(\mathcal{Z})} \frac{\delta^2}{\varepsilon^2} \mathbb{E}_{i \sim \mu_\nu} \left[ \frac{\varepsilon^2}{\delta^2 \mu_\nu(i)} \text{dis}(\mathcal{F}) \right] \\ &= N \text{dis}(\mathcal{F}), \end{aligned}$$

as desired. Here, the first inequality uses that  $\mathbb{E}_{q \sim \nu} [g(q)^2] \geq \mu_\nu(i) \mathbb{E}_{q \sim \nu_i} [f(h_i(x))]$  for some  $f \in \mathcal{F}$ , and the second uses that  $\nu_i \in \Delta(\mathcal{X})$  and the definition of  $\text{dis}$ .  $\square$

## 947 C.6 Proof of Lemma 3.9

948 **POPS as generalized OPS.** We observe that POPS is an instance of GOPS (Algorithm 3), with  
 949 discretized price set  $\mathcal{P} = \mathcal{P}_\varepsilon$  and smoothed demand function class  $\mathcal{F} = \{\text{dem}_D^\varepsilon : D \in \mathcal{D}\}$  (where  
 950 each  $f \in \mathcal{F}$  is viewed as a function on  $\mathcal{P}_\varepsilon \times \mathcal{U}$  rather than  $[0, 1] \times \mathcal{U}$ ). Here, we view each  $\hat{p}_t$  as the  
 951 posted price instead of  $p_t$ . Indeed, taking  $f^\star = \text{dem}_\star^\varepsilon$ , we have

$$\mathbb{E}[y_t | \hat{p}_t, u_t] = f^\star(\hat{p}_t, u_t)$$

952 and, for value distribution  $Q \in \Delta([0, 1])$  with smoothed demand function  $g = \text{dem}_Q^\varepsilon$ , we have

$$\ell_\lambda^\varepsilon(Q, \hat{p}_t, u_t) = \ell_\lambda(g, \hat{p}_t, u_t),$$

953 where  $\ell_\lambda$  on the right hand side is defined in (3). We do note, however, that the regret benchmark  
 954 with smoothed demands and discretized prices differs slightly from the original benchmark.

955 **Fixing the regret benchmark.** Applying Lemma C.2 for this choice of  $\mathcal{P}$  and  $\mathcal{F}$ , we have that

$$\mathbb{E} \left[ \sum_{t=1}^T \text{rev}_\star^\varepsilon(\text{br}_\star^\varepsilon(u_t), u_t) - \text{rev}_\star^\varepsilon(\hat{p}_t, u_t) \right] \leq T(25\lambda(\text{dis}(\mathcal{F}, f_\star) \vee 1) \log^2 T) - \frac{\log(\mu_1(D_\star))}{\lambda}.$$

956 Note that

$$\mathbb{E} \left[ \sum_{t=1}^T \text{rev}_\star^\varepsilon(\hat{p}_t, u_t) \right] = \mathbb{E} \left[ \sum_{t=1}^T \text{rev}_\star(p_t, u_t) \right],$$

957 so the regret bound above measures cumulative revenue in line with our original regret definition.  
 958 Although the benchmark does not match that in the original definition, we have  $|\text{rev}_\star^\varepsilon(\text{br}_\star^\varepsilon(u_t), u_t) - \text{rev}_\star(\text{br}_\star(u_t), u_t)| = O(\varepsilon)$  for all  $t \in [T]$  due to one-sided Lipschitzness (Lemma 2.1). Consequently,  
 959 the regret of POPS is bounded by

$$\mathbb{E}[R(T)] = \tilde{O} \left( T\lambda(\text{dis}(\mathcal{F}, f_\star) \vee 1) - \frac{\log(\mu_1(D_\star))}{\lambda} + \varepsilon T \right).$$

961 It remains to bound the disagreement coefficient by  $O(K_\star)$ , giving the lemma. Our argument below  
 962 mirrors that in the proof of Theorem 3.2 but takes into account the smoothing and discretization.

963 **Bounded disagreement coefficient.** For each  $u \in \mathcal{U}$ , the function  $\text{dem}_\star^\varepsilon(\cdot, u)$  with domain  $\mathcal{P}_\varepsilon$  is  
 964 piecewise constant with  $O(K_\star)$  sections. Indeed, the unsmoothed demand function  $\text{dem}_\star(\cdot, u)$  is  
 965 piecewise constant with  $O(K_\star)$  sections, and smoothing can only introduce new sections at the  
 966  $O(K_\star)$  prices in  $\mathcal{P}_\varepsilon$  that are within distance  $\varepsilon$  of a previous section boundary. Moreover, smoothing  
 967 preserves monotonicity of demand functions. Hence, the function classes defining  $\text{dis}(\mathcal{F}, f_\star)$  are  
 968  $O(K_\star)$ -composites of the nonincreasing function class. Applying Lemmas 3.4 and 3.5 then implies  
 969 that  $\text{dis}(\mathcal{F}, f_\star) = O(K_\star)$ , giving the lemma.  $\square$

## 970 C.7 Proof of Lemma 3.10

971 Fix any round  $t$  with context  $u_t$  and best-response price  $\hat{p}_t$ . Since  $\|f_D^\varepsilon - f_{D_\star}^\varepsilon\|_\infty \leq \varepsilon$ , feedback  
 972  $y_t$  coincides with that which would have been obtained if  $D_\star = D$  with probability at least  $1 - \varepsilon$ ,  
 973 conditioned on  $u_t$  and  $\hat{p}_t$ . Since the update to  $\mu_t$  is only a function of  $u_t$ ,  $\hat{p}_t$ , and  $y_t$  (notably, not the  
 974 realized price  $p_t$ ), we can iterate through all rounds and apply a union bound to obtain the lemma.  $\square$

## 975 C.8 Proof of Lemma 3.11

976 For part one, fix  $D, D' \in \Delta(\Theta)$  with  $d_L(D, D') \leq \varepsilon^2/2$ . Then, for all  $u \in \mathcal{U}$  and  $\hat{p} \in [0, 1]$ , we have

$$f_D^\varepsilon(\hat{p}, u) = \mathbb{E}_{\delta \sim \text{Unif}([0, \varepsilon])} [\text{dem}_D(\max\{\hat{p} - \delta, 0\}, u)]$$

977 Note that the maximum is unneeded since  $\text{proj}(D, u)$  is supported on  $[0, 1]$  and places no mass on  
 978 negative values. Writing  $Q = \text{proj}(D, u)$  and  $Q' = \text{proj}(D', u)$ , we then have

$$|f_D^\varepsilon(\hat{p}, u) - f_{D'}^\varepsilon(\hat{p}, u)| = \left| \mathbb{E}_{\delta \sim \text{Unif}([0, \varepsilon])} [\text{dem}_Q(\hat{p} - \delta) - \text{dem}_{Q'}(\hat{p} - \delta)] \right|$$

$$\begin{aligned}
&\leq \frac{1}{\varepsilon} \left| \int_0^1 \text{dem}_Q(\hat{p} - \delta) - \text{dem}_{Q'}(\hat{p} - \delta) d\delta \right| \\
&\leq \frac{1}{\varepsilon} \left| \int_0^1 \text{dem}_Q(t) - \text{dem}_{Q'}(t) dt \right| \\
&= \frac{1}{\varepsilon} \left| \int_0^1 \text{dem}_Q(t) - \text{dem}_{Q'}(t) dt \right|.
\end{aligned}$$

979 Writing  $\tau = \varepsilon^2/2$ , we further have

$$\begin{aligned}
\int_0^1 \text{dem}_Q(t) - \text{dem}_{Q'}(t) dt &= \int_\tau^{1+\tau} \text{dem}_Q(t - \tau) - \int_0^1 \text{dem}_{Q'}(t) dt \\
&\leq \int_\tau^1 \text{dem}_Q(t - \tau) - \text{dem}_{Q'}(t) dt + \tau \\
&\leq 2\tau,
\end{aligned}$$

980 where the last step uses the fact that  $d_L(Q, Q') \leq \tau$ . A symmetric argument gives the reverse bound.  
981 Consequently, we have  $|f_D^\varepsilon(\hat{p}, u) - f_{D'}^\varepsilon(\hat{p}, u)| \leq \frac{1}{\varepsilon} \cdot 2\tau = \varepsilon$ , as desired.

982 For part two, let  $\mathcal{C} = \{C_1, C_2, \dots, C_n\}$  denote the intersection of the standard partition of  $\mathbb{R}^d$  into  
983 cubes of side length  $\varepsilon/\sqrt{d}$  with  $\Theta \subseteq \mathbb{B}^d$ . Denote the lexicographically smallest vertex of each  
984  $C_i$  by  $c_i$ , and note that  $\log(n) = O(d \log(d/\varepsilon))$ . Given any  $D \in \Delta_K(\Theta)$ , we define the initial  
985 discretization  $\hat{D}_0 = \sum_{i=1}^n D(C_i) \delta_{c_i}$ . We obtain the final discretized measure  $\hat{D}$  by rounding each  
986 weight to a neighboring multiple of  $\varepsilon/K$  (choice doesn't matter so long as we maintain unit mass,  
987 this is always possible). Then, for any context  $u \in \mathbb{S}^{d-1}$  and price  $p \in [0, 1]$ , we have

$$\begin{aligned}
\mathbb{P}_{\theta \sim D}(\langle u, \theta \rangle \leq p) - \mathbb{P}_{\theta \sim \hat{D}}(\langle u, \theta \rangle \leq p + \varepsilon) &\leq \varepsilon \\
\mathbb{P}_{\theta \sim \hat{D}}(\langle u, \theta \rangle \leq p - \varepsilon) - \mathbb{P}_{\theta \sim D}(\langle u, \theta \rangle \leq p) &\leq \varepsilon,
\end{aligned}$$

988 using that each cube in  $\mathcal{C}$  has diameter  $\varepsilon$  and that the mass in each cube was perturbed by at most  
989  $\varepsilon/K$  (so with  $K$  cubes the probability of any event is shifted by at most  $\varepsilon$ ). Thus,  $d_L(D, \hat{D}) \leq \varepsilon$ .  
990 Using balls and bins, we can thus bound

$$N(\Delta_K(\Theta), d_L, \varepsilon) \leq n^K \binom{K + K/\varepsilon}{K} \leq n^K (2K/\varepsilon)^K = \exp(O(Kd \log(d/\varepsilon) + K \log(K/\varepsilon)),$$

991 as desired. □

## 992 C.9 Proof of Theorem 3.8

993 Fix  $\varepsilon = T^{-2}$  and  $\lambda = \sqrt{d/T}$ . We now construct  $\mathcal{D}$  and  $\mu_1$ . Write  $M = \lceil \log T \rceil$ , and, for  $i =$   
994  $1, \dots, M$ , take  $\mathcal{D}_i$  to be a minimal  $(\varepsilon^2/2)$ -cover of  $\Delta_{2^i}(\Theta)$  under the Lévy metric. By Lemma 3.11,  
995 we have  $\log |\mathcal{D}_i| = \tilde{O}(2^i d \log 1/\varepsilon)$ . Now set  $\mathcal{D} = \mathcal{D}_1 \cup \dots \cup \mathcal{D}_M$  and take  $\mu_1(D) \propto (2^i |\mathcal{D}_i|)^{-1}$  for  
996  $D \in \mathcal{D}_i$ . This ensures that  $\log(1/\mu_1(D)) = \tilde{O}(2^i d \log T)$  for  $D \in \mathcal{D}_i$ .

997 Assume without loss of generality that  $M \geq \log K_*$ ; otherwise, the regret bound is vacuous. Then,  
998 there exists  $\hat{D} \in \mathcal{D}_{\lceil \log K_* \rceil} \subseteq \mathcal{D}$  such that  $d_L(\hat{D}, D_*) \leq \varepsilon^2/2$  and  $\|\text{dem}_D^\varepsilon - \text{dem}_{D_*}^\varepsilon\|_\infty \leq \varepsilon$ , again  
999 using Lemma 3.11. Thus, by Lemma 3.10, the realized trajectory of POPS  $\{u_t, \hat{p}_t, p_t, y_t\}_{t=1}^T$  can be  
1000 coupled with an alternative trajectory  $\{u'_t, \hat{p}'_t, p'_t, y'_t\}_{t=1}^T$  of POPS with type distribution  $\hat{D}$ , such that  
1001  $\{u_t, \hat{p}_t, y_t\}_{t=1}^T = \{u'_t, \hat{p}'_t, y'_t\}_{t=1}^T$  with probability at least  $1 - \varepsilon T$ . By Lemma 3.9, we have

$$\mathbb{E} \left[ \sum_{t \in [T]} \text{rev}_{\hat{D}}(\text{br}_{\hat{D}}(u'_t), u'_t) - \text{rev}_{\hat{D}}(p'_t, u'_t) \right] = \tilde{O}(K\sqrt{dT} - \sqrt{T/d} \cdot \log \mu_1(\hat{D})) = \tilde{O}(K_*\sqrt{dT}).$$

1002 At this point, we can use the coupling guarantee and the bound  $d_L(\hat{D}, D_*) \leq \varepsilon^2$  to show that the left  
1003 hand side above and the true expected regret differ by  $O(\varepsilon^2 T) = O(1)$ , giving the theorem.

1004 The sketch in Section 3.2 was precise until the last paragraph. To formalize the remainder, we note  
 1005 that, by the coupling guarantee,

$$\begin{aligned}\mathbb{E}[R(T)] &\leq \mathbb{E}\left[\sum_{t=1}^T \text{rev}_*(\text{br}_*(u_t), u_t) - \text{rev}_*(p_t, u_t) \mid \mathcal{E}\right] + \varepsilon T^2 \\ &= \mathbb{E}\left[\sum_{t=1}^T \text{rev}_*(\text{br}_*(u'_t), u'_t) - \text{rev}_*(p_t, u'_t) \mid \mathcal{E}\right] + 1\end{aligned}$$

1006 Since  $d_L(\hat{D}, D_*) \leq \varepsilon^2$ , Lemma 2.2 implies that  $\text{rev}_*(\text{br}_*(u'_t), u'_t) \leq \text{rev}_{\hat{D}}(\text{br}_{\hat{D}}(u'_t), u'_t) + O(\varepsilon^2)$  for  
 1007 all rounds  $t$ . We further have

$$\begin{aligned}\mathbb{E}[\text{rev}_*(p_t, u'_t) \mid u'_t, \hat{p}_t] &= \text{rev}_{D_*}^{\varepsilon}(\hat{p}_t, u'_t) \\ &\leq \text{rev}_{\hat{D}}^{\varepsilon}(\hat{p}_t, u'_t) + \varepsilon \\ &= \mathbb{E}[\text{rev}_{\hat{D}}(p'_t, u'_t) \mid u'_t, \hat{p}'_t = \hat{p}_t] + \varepsilon \\ &\leq \mathbb{E}[\text{rev}_{\hat{D}}(p'_t, u'_t) \mid u'_t, \hat{p}'_t, \mathcal{E}] + \varepsilon + \varepsilon T.\end{aligned}$$

1008 Combining the above, we obtain

$$\begin{aligned}\mathbb{E}[R(T)] &\leq \mathbb{E}\left[\sum_{t=1}^T \text{rev}_*(\text{br}_*(u'_t), u'_t) - \text{rev}_*(p_t, u'_t) \mid \mathcal{E}\right] + \varepsilon T^2 \\ &\leq \mathbb{E}\left[\sum_{t=1}^T \text{rev}_{\hat{D}}(\text{br}_{\hat{D}}(u'_t), u'_t) - \text{rev}_*(p_t, u'_t) \mid \mathcal{E}\right] + O(\varepsilon T^2) \\ &= \mathbb{E}\left[\sum_{t=1}^T \text{rev}_{\hat{D}}(\text{br}_{\hat{D}}(u'_t), u'_t) \mid \mathcal{E}\right] - \mathbb{E}\left[\sum_{t=1}^T \mathbb{E}[\text{rev}_*(p_t, u'_t) \mid u'_t, \hat{p}_t] \mid \mathcal{E}\right] + O(1) \\ &\leq \mathbb{E}\left[\sum_{t=1}^T \text{rev}_{\hat{D}}(\text{br}_{\hat{D}}(u'_t), u'_t) \mid \mathcal{E}\right] - \mathbb{E}\left[\sum_{t=1}^T \mathbb{E}[\text{rev}_{\hat{D}}(p'_t, u'_t) \mid u'_t, \hat{p}'_t, \mathcal{E}] \mid \mathcal{E}\right] + O(1) \\ &\leq \mathbb{E}\left[\sum_{t=1}^T \text{rev}_{\hat{D}}(\text{br}_{\hat{D}}(u'_t), u'_t) - \sum_{t=1}^T \text{rev}_{\hat{D}}(p'_t, u'_t) \mid \mathcal{E}\right] + O(1) \\ &\leq \mathbb{E}\left[\sum_{t=1}^T \text{rev}_{\hat{D}}(\text{br}_{\hat{D}}(u'_t), u'_t) - \sum_{t=1}^T \text{rev}_{\hat{D}}(p'_t, u'_t)\right] + O(1) \\ &= \tilde{O}(K_* \sqrt{dT}),\end{aligned}$$

1009 as desired.  $\square$

1010 Finally, we seek to understand the fundamental barriers to effective pricing. The following lower  
 1011 bound shows that our  $\tilde{O}(K_* \sqrt{dT})$  guarantee for POPS has optimal dependence on  $d$  and  $T$ .

1012 **Theorem C.7.** Fix  $K_* \geq 2$  and  $T \geq d \cdot K_*^3$ . For any  $d$ -dimensional contextual pricing algorithm  
 1013  $\mathcal{A}$ , there exists a problem instance with  $K_*$  types and stochastic contexts such that  $\mathbb{E}[R_{\mathcal{A}}(T)] =$   
 1014  $\Omega(\sqrt{K_* dT})$ .

1015 This result holds even when the seller knows  $K_*$ . Previously, [4] proved a lower bound of  $\Omega(\sqrt{K_* T})$   
 1016 for the non-contextual case. Our proof modifies their one-dimensional construction so that it can be  
 1017 cleanly tensored into  $d$  dimensions. We defer the proofs of some minor claims to Appendix C.10.

1018 **Proof of Theorem C.7** Starting in 1D, we define valuations  $\frac{1}{2} \leq v_1, \dots, v_{K_*} \leq 1$  by  $v_i :=$   
 1019  $\frac{1}{2} + \frac{i-1}{4K_*-2i-2}$ . Define the base distribution  $Q_0$  on  $\{v_1, \dots, v_{K_*}\}$  as follows:  $\forall i \in [K_*-1], Q_0(v_i) :=$   
 1020  $1/(2K_*-2)$ , and for  $i = K_*, Q_0(v_i) := 1/2$ . Observe that each valuation  $v_i$  has the same expected  
 1021 revenue of  $1/2$ . That is,  $\text{rev}_{Q_0}(v_i) = v_i \mathbb{P}_{V \sim Q_0}(V \geq v_i) = 1/2$  for all  $i \in [K_*]$ . Now, for  
 1022  $j \in \{2, \dots, K_*-1\}$ , we define distribution  $Q_j$  by slightly lowering the probability of  $v_{j-1}$  and  
 1023 increasing the probability of  $v_j$  by the same amount. That is,  $Q_j(v_i) := Q_0(v_i) - \varepsilon$  for  $i = j-1$

and  $Q_j(v_i) := Q_0(v_i) - \varepsilon$  for  $i = j$ , where  $\varepsilon > 0$  is a small constant to be determined. In contrast to the family of instances specified in [4], our  $Q_j$  distributions share the same multiset of probability weights, differing only in the locations of the perturbed valuations. This difference allows us to tensor these problem instances into a  $d$ -dimensional instance without leaking information between instances.

**Tensoring one-dimensional instances.** To extend these one-dimensional distributions into  $d$ -dimensional space, define the base distribution  $D_0 \in \Delta([0, 1]^d)$  as follows. For each  $i \in [K_\star]$ , let  $\theta_i = [v_i, \dots, v_i] \in \mathbb{R}^d$ ,  $w_i = Q_0(v_i)$ , and take  $D_0 = \sum_{i=1}^{K_\star} w_i \delta_{\theta_i}$ . Thus,  $\theta_i$  is a  $d$ -dimensional vector with all entries equal to  $v_i$ , and  $w_i$  is the probability  $D_0$  places on  $\theta_i$ , taken to match  $Q_0$  at  $v_i$ . Now, for a selection  $j = (j_1, \dots, j_d) \in \{2, \dots, K_\star - 1\}^d$ , define the perturbed instance  $D_j$  by starting from  $D_0$  and modifying it as follows:

- Adjust the probabilities  $w_1$  and  $w_2$  by  $w_1 \leftarrow w_1 - \varepsilon$  and  $w_2 \leftarrow w_2 + \varepsilon$ .
- For each dimension  $\ell \in [d]$ , adjust the  $\theta_i$  vectors so that the marginal distribution of their  $\ell$ th coordinates coincides with  $Q_{j_\ell}$ . Specifically, swap  $\theta_{j_\ell-1}[\ell]$  with  $\theta_1[\ell]$  and  $\theta_{j_\ell}[\ell]$  with  $\theta_2[\ell]$ .

This construction ensures that for each dimension  $i$ , the marginal distribution of  $D_j$  is  $Q_{j_i}$  (see Lemma C.8).

**Lower bounding the regret.** First, we show that no one-dimensional pricing algorithm can achieve regret  $o(\sqrt{KT})$  for  $T \geq K_\star^3$  when  $D_\star$  is sampled uniformly at random from the  $Q_j$  distributions in a similar fashion to [4]. For completeness, the full argument (including the tuning of  $\varepsilon$ ) appears in Lemma C.9. For the contextual setting, we sample a selection  $j = (j_1, \dots, j_d) \in [K]^d$  uniformly at random and set  $D_\star$  to the perturbed instance  $D_j$ . Then we split the time horizon  $T$  into  $d$  contiguous epochs of length  $T/d$ . During epoch  $l$ , we choose the contexts to be the standard basis vector for dimension  $l$ . This means the algorithm interacts with a “new” one-dimensional problem instance during that epoch and thus incurs regret  $\Omega(\sqrt{KT/d})$  when  $T \geq d \cdot K_\star^3$ . Summing this over the  $d$  epochs gives the desired result. To achieve this lower bound with stochastic contexts, we forgo epochs and instead sample each  $u_t$  uniformly at random from the  $d$  standard basis vectors; a similar argument still applies (see Lemma C.10 for details).  $\square$

## C.10 Missing Lemmas from Proof of Theorem C.7

**Lemma C.8.** *For each coordinate  $\ell \in [d]$ , in the instance  $D_j$ , the marginal distribution of the  $\ell$ th coordinate is precisely  $Q_{j_\ell}$ . That is, for every valuation  $v_k$ ,*

$$\mathbb{P}_{\theta \sim D_j}(\theta[\ell] = v_k) = Q_{j_\ell}(v_k).$$

*Proof.* Recall that in the base instance  $D_0 = \sum_{i=1}^{K_\star} w_i \delta_{\theta_i}$ , each type  $i$  occurs with probability  $w_i = Q_0(v_i)$  and, in every coordinate, its value is  $v_i$ . Thus, the marginal distribution on any coordinate is  $Q_0$ . For a fixed coordinate  $\ell$ , the construction perturbs  $D_0$  as follows:

1. In the  $\ell$ th coordinate, we swap the entries of the following types:
  - Replace the  $\ell$ th coordinate of type 1 by  $v_{j_\ell-1}$  and that of type  $j_\ell - 1$  by  $v_1$ .
  - Replace the  $\ell$ th coordinate of type 2 by  $v_{j_\ell}$  and that of type  $j_\ell$  by  $v_2$ .
2. The probability weight of type 1 is decreased by  $\varepsilon$  and that of type 2 is increased by  $\varepsilon$ . All other weights remain unchanged.

After these modifications, the marginal on coordinate  $\ell$  is obtained by “reassigning” the masses as follows:

- The mass originally at  $v_1$  (from type 1) is now associated with  $v_{j_\ell-1}$  (since type 1 now has coordinate  $v_{j_\ell-1}$ ); however, due to the probability adjustment, the effective mass at  $v_{j_\ell-1}$  becomes

$$Q_0(v_{j_\ell-1}) - \varepsilon.$$



1067 • Similarly, the mass originally at  $v_2$  (from type 2) is now associated with  $v_{j_\ell}$ , yielding an  
 1068 effective mass

$$Q_0(v_{j_\ell}) + \varepsilon.$$

1069 • For all other values  $v_i$  (with  $i \notin \{1, 2, j_\ell - 1, j_\ell\}$ ), the coordinate remains unchanged and  
 1070 the mass is  $Q_0(v_i)$ .

1071 This exactly corresponds to the definition of the perturbed one-dimensional distribution  $Q_{j_\ell}$ , which is  
 1072 given by:

$$Q_{j_\ell}(v_{j_\ell-1}) = Q_0(v_{j_\ell-1}) - \varepsilon, \quad Q_{j_\ell}(v_{j_\ell}) = Q_0(v_{j_\ell}) + \varepsilon,$$

1073 with  $Q_{j_\ell}(v_i) = Q_0(v_i)$  for all  $i \notin \{j_\ell - 1, j_\ell\}$ . Thus, for any coordinate  $\ell$ , the marginal distribution  
 1074 of the  $\ell$ th coordinate of  $D_j$  is exactly  $Q_{j_\ell}$ , as required.  $\square$

1075 **Lemma C.9** (Regret of one dimensional family). *Fix any number of types  $K_\star \geq 3$  and  $T \geq K_\star^3$ , the*  
 1076 *distribution over problem instances described in Appendix C.9 ensures that the expected regret of any*  
 1077 *pricing strategy is  $\Omega(\sqrt{K_\star T})$ .*

1078 *Proof.* This proof follows the same steps in the lower bound proof of [4], albeit with a different set  
 1079 of problem instances. First we recall the construction: we define valuations  $\frac{1}{2} \leq v_1, \dots, v_{K_\star} \leq 1$  by

$$v_i = \frac{1}{2} + \frac{i-1}{4K_\star - 2i - 2}.$$

1080 Define the base distribution  $Q_0$  on  $\{v_1, \dots, v_{K_\star}\}$  as follows:

$$Q_0(v_i) = \begin{cases} \frac{1}{2K_\star - 2} & \forall i \in [K_\star - 1] \\ \frac{1}{2} & i = K_\star \end{cases}.$$

1081 Observe that each valuation  $v_i$  has the same expected revenue of  $1/2$ . That is,  $\text{rev}_{Q_0}(v_i) =$   
 1082  $v_i \mathbb{P}_{V \sim Q_0}(V \geq v_i) = 1/2$  for all  $i \in [K_\star]$ . Now, for  $j \in \{2, \dots, K_\star - 1\}$ , we define distribu-  
 1083 tion  $Q_j$  by slightly lowering the probability of  $v_{j-1}$  and increasing the probability of  $v_j$  by the same  
 1084 amount:

$$Q_j(v_i) = \begin{cases} Q_0(v_i) & i \in [K_\star] \setminus \{j-1, j\} \\ Q_0(v_i) - \varepsilon & i = j-1 \\ Q_0(v_i) + \varepsilon & i = j \end{cases}$$

1085 Here  $\varepsilon > 0$  will be determined later. Observe that if the buyer valuations are drawn from  $Q_j$ , the  
 1086 valuation  $v_j$  achieves expected revenue at least  $1/2 + \varepsilon$ , whereas all other  $v \neq v_j$  achieve about  $1/2$ .

1087 Let  $J$  be uniformly distributed over  $[K_\star]$ , and let the valuations  $V_1, \dots, V_T$  be i.i.d. from  $Q_J$ . This  
 1088 means that we first select  $J \in [K_\star]$  uniformly at random (the “good” valuation index), and then,  
 1089 given  $J = j$ , each  $V_t$  is drawn independently from  $Q_j$ . A pricing strategy  $\mathcal{A}$  is a sequence of prices  
 1090  $(X_1, \dots, X_T)$  that may depend on past observations. The regret of  $\mathcal{A}$  over  $T$  rounds is

$$R_{\mathcal{A}}(T) = \max_{k \in [K_\star]} \sum_{t=1}^T r_t(v_k) - \sum_{t=1}^T r_t(X_t),$$

1091 where  $r_t(\cdot)$  is the realized revenue in round  $t$ .

1092 We first argue that whenever the algorithm  $\mathcal{A}$  does *not* pick the “good” valuation  $v_J$ , it loses at least  $\varepsilon$   
 1093 in expected revenue at that round. Concretely, define

$$N_j = \sum_{t=1}^T \mathbb{1}\{X_t = v_j\}$$

1094 as the number of times the algorithm posts price  $v_j$ . Because picking  $v_J$  yields zero regret on those  
 1095 rounds and any other price yields at least  $\varepsilon$  of regret, we obtain

$$\mathbb{E}_{J,V} \left[ \sum_{t=1}^T r_t(v_k) - \sum_{t=1}^T r_t(X_t) \right] \geq \varepsilon \left( T - \mathbb{E}_{J,V} [N_J] \right). \quad (5)$$

(The expectation is over both the random choice of  $J$  and the random draws of valuations  $V_1, \dots, V_T$ .)  
 Next, we control  $\mathbb{E}_{J,V}[N_j]$  by coupling the distributions  $Q_j$  and  $Q_0$  and applying Pinsker's inequality. Let  $Y_t = \mathbf{1}\{V_t \geq X_t\}$ , and write  $q_j(\cdot)$  and  $q_0(\cdot)$  for the induced distributions on the entire sequence  $Y^T = (Y_1, \dots, Y_T)$  under  $Q_j$  and  $Q_0$ , respectively. For any deterministic function  $f : \{0, 1\}^T \rightarrow [0, M]$ ,

$$\mathbb{E}_{V \sim Q_j}[f(Y)] - \mathbb{E}_{V \sim Q_0}[f(Y)] \leq M \sqrt{\frac{1}{2} \text{KL}(q_0 \| q_j)}.$$

By a chain rule argument, whenever  $X_t \neq v_j$ , the local conditional distributions for  $Y_t$  coincide under  $Q_0$  and  $Q_j$ , thus incurring zero KL divergence. The only deviation comes from the rounds  $t$  where  $X_t = v_j$ . For all  $v_j \geq 3/4$  and  $\varepsilon < 1/6$ , using the fact that  $\text{KL}(x \| x + \alpha) \leq \alpha^2(x + \alpha)^{-1}(1 - x - \alpha)^{-1}$

$$\text{KL}\left(\frac{1}{2v_j} \parallel \frac{1}{2v_j} + \varepsilon\right) \leq 18\varepsilon^2$$

Therefore,

$$\text{KL}(q_0 \| q_j) \leq 18\varepsilon^2 \sum_{t=1}^T Q_0(X_t = v_j) = 18\varepsilon^2 T Q_0(v_j) = 18\varepsilon^2 \mathbb{E}_{V \sim Q_0}[N_j]$$

This allows us to bound the difference in expectations of any deterministic statistic of  $Y$ . In particular, since  $N_j$  itself is a deterministic function of  $Y$  under a fixed strategy,

$$\mathbb{E}_{V \sim Q_j}[N_j] \leq \mathbb{E}_{V \sim Q_0}[N_j] + \varepsilon T \sqrt{18 \mathbb{E}_{V \sim Q_0}[N_j]}.$$

Taking expectation also over  $J$ , one gets

$$\mathbb{E}_{J,V}[N_j] \leq \mathbb{E}_J[\mathbb{E}_{V \sim Q_0}[N_j]] + \varepsilon T \sqrt{18 \mathbb{E}_J[\mathbb{E}_{V \sim Q_0}[N_j]]}.$$

Since  $\sum_{j=1}^K N_j = T$  and  $J$  is uniform over  $[K]$ , it follows that  $\sum_{j=1}^K \mathbb{E}_{V \sim Q_0}[N_j] = T$ , while on average  $\mathbb{E}_J[\mathbb{E}_{Q_0}[N_j]]$  cannot exceed some fraction of  $T$ . Putting these together in (5)

$$\mathbb{E}_{J,V}\left[\sum_{t=1}^T r_t(v_k) - \sum_{t=1}^T r_t(X_t)\right] \geq \varepsilon \left(T - \mathbb{E}_J[\mathbb{E}_{V \sim Q_0}[N_j]] - \varepsilon T \sqrt{18 \mathbb{E}_J[\mathbb{E}_{V \sim Q_0}[N_j]]}\right). \quad (6)$$

Substituting into the above expression and choosing  $\varepsilon$  to be  $\frac{1}{6\sqrt{18}} \sqrt{K_\star/T}$  as long as  $T \geq K_\star^3$  yields a final lower bound on the regret of the form

$$\mathbb{E}[R_{\mathcal{A}}(T)] \geq \varepsilon T \left(\frac{1}{3} - \varepsilon \sqrt{18 \frac{T}{K_\star}}\right) \geq \Omega(\sqrt{K_\star T}),$$

as desired.  $\square$

**Lemma C.10** (Stochastic Contexts). *Fix any number of types  $K_\star \geq 2$  and time horizon  $T \geq d \cdot K_\star^3$ . For any  $d$ -dimensional contextual pricing algorithm  $\mathcal{A}$ , there exists a problem instance with  $K_\star$  types and stochastic contexts such that  $\mathbb{E}[R_{\mathcal{A}}(T)] = \Omega(\sqrt{K_\star d T})$ .*

**Proof of Lemma C.10** We sample a selection  $j = (j_1, \dots, j_d) \in [K]_d$  uniformly at random and set  $D_\star$  to the perturbed instance  $D_j$ . For each time step  $t \in [T]$ , we sample a coordinate  $\ell \in [d]$  and set  $u_t$  to be the basis vector in the direction of  $\ell$ . After  $T$  rounds, with probability at least  $1 - o(1)$ , each coordinate  $\ell$  is sampled at least  $T/d - \sqrt{T/d \log T}$  times by a Chernoff bound. The regret of the one dimension instance corresponding to  $\ell$  during these rounds is at least  $\Omega(\sqrt{K_\star T/d})$ . Summing across dimensions gives the desired result.  $\square$

## D Proofs for Section 4

Since our analysis exclusively reasons about the true type distribution  $D_\star$ , we abbreviate  $\text{dem} = \text{dem}_\star$ ,  $\text{rev} = \text{rev}_\star$ ,  $\text{gap} = \text{gap}_\star$ , and  $\text{br} = \text{br}_\star$ . For each price  $p \in [0, 1]$  and round  $t \in [T]$ , we define

---

**ALGORITHM 4:** ZoomV: Variance-Aware Zooming for Non-Contextual Pricing

---

```

1 Initialize: active price set  $S \leftarrow \{\frac{2^i}{T} : i = 0, 1, \dots, \lfloor \log_2 T \rfloor\} \cup \{1\}$ ;
2 for each round  $t \in [T]$  do
3   play  $p_t \in \arg \max_{q \in S} \text{index}_t(q)$ ;
4   observe  $y_t = \mathbb{1}\{\theta_t \leq p_t\}$  and update  $n_{t+1}(p_t)$ ;
5   if a price  $p > 1/T$  becomes uncovered then
6      $q \leftarrow \min\{q' \in S : q' > p_t\}$ ;
7      $S \leftarrow S \cup \{(p_t + q)/2\}$ 

```

---

$\mathcal{T}_t(p) := \{\tau \in [t-1] : p_\tau = p\}$  as the set of previous rounds where  $p$  was played, and let  
 $n_t(p) := |\mathcal{T}_t(p)|$  denote the count of these rounds. We define  $\mu_t(p) := \frac{1}{n_t(p)} \sum_{\tau \in \mathcal{T}_t(p)} p y_\tau$  as  
the average revenue during these rounds,  $V_t(p) := \frac{1}{n_t(p)-1} \sum_{\tau \in \mathcal{T}_t(p)} (p y_\tau - \mu_t(p))^2$  as the sample  
variance, and  $\sigma^2(p) := p^2 \text{dem}(p)(1 - \text{dem}(p))$  as the population variance, which remains unknown  
to the seller. When  $n_t(p) = 0$ , we set  $\mu_t(p) = 0 = V_t(p) = 0$ , and when  $n_t(p) = 1$ , we take  
 $V_t(p) = \infty$ . The confidence radius is given by  $r_t(p) := \sqrt{\frac{10V_t(p) \log T}{n_t(p)} + \frac{12 \log(T)}{n_t(p)-1}}$ , which is taken  
as  $+\infty$  if  $n_t(p) \leq 1$ . A variant of Bernstein's inequality ensures that  $|\mu_t(p) - \text{rev}(p)| \leq r_t(p)$   
with high probability (see Lemma D.1). Defining the upper confidence bound as  $\text{UCB}_t(p) :=$   
 $\mu_t(p) + r_t(p)$ , it follows that  $\text{rev}(p) \leq \text{UCB}_t(p)$  with high probability. A price  $p$  is said to be  
covered by some  $q \in S$  if  $p \in [q, q + r_t(q)]$  and  $q$  is the largest active price no greater than  $p$ , i.e.,  
 $q = \max\{q' \in S : q' \leq p\}$ . The one-sided Lipschitz property of the revenue function (Lemma 2.1)  
implies that  $\text{rev}(p) - \text{rev}(q) \leq r_t(q)$  with high probability. Finally, we define the index of a price  
 $q \in S$  as  $\text{index}_t(q) := \text{UCB}_t(q) + r_t(q)$ , ensuring that any price  $p$  covered by some  $q \in S$  satisfies  
 $\text{rev}(p) \leq \text{index}_t(q)$ .

### 1139 D.1 Proof of Lemma 4.2

1140 We begin with a few helper lemmas. Throughout, we assume that  $T \geq 3$  (otherwise the regret bound  
1141 holds trivially). Our proofs mirror those of similar lemmas in [27], with small adjustments to handle  
1142 the variance-adjusted confidence radii and the dyadic price selection rule.

1143 **Lemma D.1** (Concentration). *Write  $\mathcal{E}_{\text{clean}}$  for the event that*

$$|\mu_t(p) - \text{rev}(p)| \leq r_t(p) \leq \sqrt{\frac{10 \sigma^2(p) \log T}{n_t(p)}} + \frac{126 \log(T)}{n_t(p) - 1}$$

1144 *for all  $t \in [T]$  and for all  $p \in [0, 1]$ . Then  $\Pr(\mathcal{E}_{\text{clean}}) \geq 1 - 8T^{-2}$ .*

1145 *Proof.* For fixed  $p \in [0, 1]$  and  $t \in [T]$ , Theorems 10 and 11 of Maurer and Pontil [20] imply that

$$\begin{aligned}
|\mu_t(p) - \text{rev}(p)| &\leq r_t(p) \\
|\sigma_t(p) - \sqrt{V_t(p)}| &\leq \sqrt{\frac{11 \log T}{n_t(p) - 1}}
\end{aligned}$$

1146 with probability  $1 - 8T^{-5}$ . We note that similar bounds appear in [2], which inspired our adjustments  
1147 to the confidence intervals. Under this event, we further bound

$$\begin{aligned}
r_t(p) &= \sqrt{\frac{10V_t(p) \log T}{n_t(p)}} + \frac{12 \log T}{n_t(p) - 1} \\
&\leq \sqrt{\frac{10\sigma^2(p) \log T}{n_t(p)}} + \sqrt{\frac{10 \log T}{n_t(p)}} \sqrt{\frac{11 \log T}{n_t(p) - 1}} + \frac{12 \log T}{n_t(p) - 1} \\
&\leq \sqrt{\frac{10\sigma^2(p) \log T}{n_t(p)}} + \frac{126 \log T}{n_t(p) - 1}.
\end{aligned}$$

1148 Taking a union bound over  $t$ , the above must hold for all  $t \in [T]$  with probability at least  $1 - 8T^{-4}$ .  
 1149 Now, the same Chernoff bound argument used in Claim 4.13 of Slivkins et al. [27] implies that  
 1150  $|\mu_t(p) - \text{rev}(p)| \leq r_t(p)$  for all  $p \in [0, 1]$  and  $t \in [T]$  with probability at least  $1 - 8T^{-2}$ . One  
 1151 technical observation is that Claim 4.13 requires that the set of arms every played by the algorithm is  
 1152 finite. This holds for ZoomV due to our dyadic arm activation rule.  $\square$

1153 **Lemma D.2** (Covering invariant). *At the beginning of each round, every price  $p \geq 1/T$  is covered*  
 1154 *by some active arm.*

1155 *Proof.* At round 1,  $r_t(q) = \infty$  for all active arms  $q \in S$ , and so all arms larger than  $1/T$  are covered  
 1156 by our choice of  $S$ . Now, suppose that the lemma holds up to round  $t$ , and that playing  $p_t$  causes a  
 1157 price  $p \in R$  to become uncovered. Then, by the definition of covering, we must have

$$p_t \leq p_t + r_{t+1}(p_t) < p < q \leq p_t + r_t(p_t),$$

1158 where  $q$  is the nearest active price to the right of  $p_t$ , selected at Step 6. First, verify that the  
 1159 added price,  $p' := (p_t + q)/2$ , is less than  $p$ . Since  $r_{t+1}(p_t)$  must be less than one, we must have  
 1160  $n_{t+1}(p) - 1 = n_t(p) \geq 12$ . Thus, we can bound

$$\begin{aligned} V_{t+1}(p) &= \frac{p^2}{n_{t+1}(p)(n_{t+1}(p) - 1)} \sum_{\tau_1 \in \mathcal{T}_{t+1}(p)} \sum_{\tau_2 \in \mathcal{T}_{t+1}(p)} (y_{\tau_1} - y_{\tau_2})^2 \\ &\geq \frac{p^2}{(n_t(p) + 1)n_t(p)} \sum_{\tau_1 \in \mathcal{T}_t(p)} \sum_{\tau_2 \in \mathcal{T}_t(p)} (y_{\tau_1} - y_{\tau_2})^2 \\ &= \frac{n_t(p) - 1}{n_t(p) + 1} V_t(p) \\ &\geq \frac{11}{13} V_t(p). \end{aligned}$$

1161 Consequently, one can show that

$$r_{t+1}(p_t) = \sqrt{\frac{10V_{t+1}(p) \log T}{n_t(p) + 1}} + \frac{12 \log(T)}{n_t(p)} \geq \frac{3}{4} \sqrt{\frac{10V_t(p) \log T}{n_t(p)}} + \frac{12 \log(T)}{n_t(p) - 1} = \frac{3}{4} r_t(p_t).$$

1162 Combining, we find that  $p' = (p_t + q)/2 \leq p_t + \frac{1}{2} r_t(p_t) < p_t + r_{t+1}(p_t) < p$ , as desired. Moreover,  
 1163  $p'$  could not have already been active at round  $t$ ; otherwise,  $p_t$  would not have been covering  $p$ .  
 1164 Finally, once  $p'$  is added, it covers  $p$  since  $r_{t+1}(p') = \infty$ .  $\square$

1165 **Lemma D.3** (Gap bound). *Condition on  $\mathcal{E}_{\text{clean}}$ . Then  $\text{gap}(p) \leq 5r_t(p)$  and  $n_t(p) \leq \frac{252\sigma^2(p) \log T}{\text{gap}(p)^2} +$   
 1166  $\frac{504 \log T}{\text{gap}(p)}$  for all  $p \in [0, 1]$  and  $t \in [T]$ .*

1167 *Proof.* Write  $\hat{p} = \max\{\text{br}, \frac{1}{T}\}$ , and fix any price  $p \in [0, 1]$ . Consider some round  $t$  at which  $p$  is  
 1168 played. By Lemma D.2, we know that  $\hat{p}$  was covered at the beginning of round  $t$  by some price  $q \in S$ ,  
 1169 and that  $p$  had a higher index than  $q$ . Hence,

$$\begin{aligned} \text{index}_t(p) &\geq \text{index}_t(q) && \text{(since } p \text{ was played)} \\ &= \text{UCB}_t(q) + r_t(q) && \text{(by definition of index)} \\ &\geq \mu(q) + r_t(q) && \text{(concentration guarantee)} \\ &\geq \text{rev}(\hat{p}). && (\hat{p} \text{ covered by } q) \end{aligned}$$

1170 Moreover,  $\text{index}_t(p) \leq \mu_t(p) + 2r_t(p) \leq \text{rev}(p) + 3r_t(p)$ . Thus,

$$\text{gap}(p) = \text{rev}(p_\star) - \text{rev}(p) \leq \frac{1}{T} + \text{rev}(\hat{p}) - \text{rev}(p) \leq \frac{1}{T} + 3r_t(p).$$

1171 Now, if  $n_t(p) \leq 12$ ,  $\text{gap}(p) \leq 1 < r_{t+1}(p)$ . Otherwise, the bound above implies that  $\text{gap}(p) \leq$   
 1172  $5r_{t+1}(p)$ . Since  $r_t(p)$  only changes when  $p$  is played and  $\text{gap}(p) \leq 5r_t(p)$  when  $t = 1$ , this guarantee  
 1173 holds for all  $t$ . For the other bound, we apply concentration to obtain

$$\text{gap}(p) \leq 5 \left( \sqrt{\frac{10 \sigma^2(p) \log T}{n_t(p)}} + \frac{126 \log(T)}{n_t(p) - 1} \right).$$

1174 Rearranging and solving the quadratic inequality in  $n_t(p)$  gives the stated result.  $\square$

1175 Compared to the standard gap bound lemma for zooming (see, e.g., Lemma 4.14 of 27), Lemma D.3  
 1176 is adapted to the variance of each price  $p$ . We can now prove the regret bound.

1177 **Lemma D.4** (Active arm separation). *Conditioned on  $\mathcal{E}_{\text{clean}}$ , consider any three consecutive active*  
 1178 *arms  $x < y < z$  which did not belong to  $S$  at initialization. Then  $z - x > \frac{1}{10} \min\{\text{gap}(x), \text{gap}(y)\}$ .*

1179 *Proof.* If  $y$  was activated before  $z$ , then  $z$  must have been added as the midpoint of active arms  $y$  and  
 1180  $y + 2(z - y) = 2z - y$  at round  $\tau_z$ , when  $y$  must have not covered  $2z - y$ . Thus, by Lemma D.3, we  
 1181 would have  $2(z - x) > 2(z - y) = (2z - y) - y > \frac{1}{5}\text{gap}(y)$ . On the other hand, if  $y$  was activated  
 1182 after  $z$ , then it must have been added as the midpoint of  $x$  and  $z$  at round  $\tau_y$ , when  $x$  must have not  
 1183 covered  $z$ . Again, by Lemma D.3, this would imply  $z - x > \frac{1}{5}\Delta(y)$ .  $\square$

1184 **Proof of Lemma 4.2** We freely condition on  $\mathcal{E}_{\text{clean}}$ , since the complement has negligible probability  
 1185  $O(T^{-2})$ . For each  $\delta > 0$ , let  $Y_\delta \subseteq X_{2\delta}$  denote the set of activated prices  $p$  with  $\text{gap}(p) \in [\delta, 2\delta)$ . In  
 1186 what follows, we say that two prices are adjacent if they are neighboring within  $Y_\delta$ . Note that at most  
 1187  $O(\log T)$  of the prices in  $Y_\delta$  were activated at initialization. Consider the set  $Y_\delta^0$  which, for each such  
 1188 price, contains this price and up to two neighboring prices, such that the remaining prices  $Y_\delta \setminus Y_\delta^0$   
 1189 can be split into triples of neighboring prices. We then decompose

$$Y_\delta \setminus Y_\delta^0 = \{p_{1,1} < p_{1,2} < p_{1,3} < p_{2,1} < p_{2,2} < p_{2,3} < \dots < p_{n,1} < p_{n,2} < p_{n,3}\},$$

1190 where  $p_{i,1}, p_{i,2}, p_{i,3}$  are neighboring for each  $i \in [n]$ . By Lemma D.4, we have  $p_{i,3} - p_{i,1} > \delta/10$   
 1191 for all  $i \in [n]$ , and so  $p_{i,k} - p_{j,k} > \delta/10$  for all  $k \in [3]$  whenever  $i < j - 1$ . Thus, we can  
 1192 partition  $Y_\delta \setminus Y_\delta^0$  into at most 6 packings, each of which has separation at least  $\delta/10$ . Of course any  
 1193  $(\delta/10)$ -packing of  $Y_\delta \subseteq X_{2\delta}$  is contained within a  $(\delta/5)$ -cover of  $X_{2\delta}$ . Consequently, we have

$$\sum_{p \in Y_\delta} \sigma^2(p) \leq 6N_{\text{var}}(X_{2\delta}, \delta/5) + O(\log T) \leq 6c\delta^{-z} + O(\log T).$$

1194 Noting that a  $(\delta/10)$ -packing within  $[0, 1]$  can have cardinality at most  $10\delta^{-1}$ , we further bound  
 1195  $|Y_\delta| = O(\log T + \delta^{-1})$ . Thus, by Lemma D.3, the regret incurred due to posting prices in  $Y_\delta$  is at  
 1196 most

$$\begin{aligned} 2\delta \cdot \sum_{p \in Y_\delta} O(\sigma^2(p) \log(T)\delta^{-2} + \log(T)\delta^{-1}) &= O\left(\log(T)\delta^{-1} \sum_{p \in Y_\delta} \sigma^2(p) + \log(T)|Y_\delta|\right) \\ &= O\left(\log(T)(c\delta^{-1-z} + \log(T)\delta^{-1}) + \log(T)(\log T + \delta^{-1})\right) \\ &= O(c\log(T)\delta^{-1-z} + \log^2(T)\delta^{-1}) \end{aligned}$$

1197 Now we sum over  $\delta = 1/2, 1/4, \dots, \alpha$ , where  $\alpha$  will be tuned later, giving a total regret bound of

$$\sum_{j=1}^{\log(1/\alpha)} \left[ c\log(T)2^{j(1+z)} + \log^2(T)2^j \right] + \alpha T = O\left(c\log(T)\alpha^{-(1+z)} + \log^2(T)\alpha^{-1} + \alpha T\right).$$

1198 Taking  $\alpha = (c\log(T)/T)^{1/(2+z)}$ , we obtain the desired regret bound of  $\tilde{O}(c^{1/(2+z)}T^{1-1/(2+z)})$ .  
 1199  $\square$

## 1200 E Proofs for Section 5

1201 We first recall some standard results from Vapnik–Chervonenkis (VC) theory. Given two distributions  
 1202  $D, D'$  over a shared space  $\mathcal{X}$ , we define the total variation distance  $\|D - D'\|_{\text{TV}} := \sup_{A \subseteq \mathcal{X}} |D(A) -$   
 1203  $D'(A)|$ .

1204 **Lemma E.1** (Section 28.1 of 25). *Fix a finite set  $\mathcal{X}$ , a function family  $\mathcal{F} \subseteq \{0, 1\}^{\mathcal{X}}$ , a distribution*  
 1205  *$D \in \Delta(\mathcal{X})$ , and  $\delta \in (0, 1)$ . Then, for  $X_1, \dots, X_n$  sampled i.i.d. from  $D$ , we have*

$$\sup_{f \in \mathcal{F}} \left| \mathbb{E}_{x \sim D}[f(x)] - \frac{1}{n} \sum_{i=1}^n f(X_i) \right| = O\left(\sqrt{\frac{V \log(n/V) + \log(1/\delta)}{n}}\right)$$

1206 *with probability at least  $1 - \delta$ , where  $V$  is the VC dimension of  $\mathcal{F}$ .*

1207 **Lemma E.2** (Theorem 9.3 of 25). *The family  $\mathcal{F} = \{0, 1\}^{\mathcal{X}}$  has VC dimension  $|\mathcal{X}|$ , and the family of*  
 1208 *linear thresholds over  $\mathbb{R}^d$  has VC dimension  $d + 1$ . The former result implies that, under the setting*  
 1209 *above, we have*

$$\|D - \hat{D}_n\|_{\text{TV}} = O\left(\sqrt{\frac{|\mathcal{X}| \log(n/|\mathcal{X}|) + \log(1/\delta)}{n}}\right)$$

1210 *with probability at least  $1 - \delta$ .*

1211 We also recall Bernstein’s inequality for the case of i.i.d. Bernoulli random variables.

1212 **Lemma E.3** (Theorem 2.10 of 3). *For i.i.d.  $X_1, \dots, X_n \sim \text{Ber}(p)$  and  $\delta > 0$ ,*

$$\sum_{i=1}^n X_i \leq pn + \sqrt{2np \log(1/\delta)} + \log(1/\delta)/3$$

1213 *with probability at least  $1 - \delta$ .*

1214 We now turn to the main proofs.

### 1215 E.1 Observed Type Identifiers (Proof of Theorem 5.1)

1216 To state our result for the first setting, we introduce an  $\varepsilon$ -ball performance metric for contextual  
 1217 search. This is a slight strengthening of the standard  $\varepsilon$ -ball metric  $\sum_{t=1}^T \mathbb{1}\{|p_t - v_t| > \varepsilon\}$ .

1218 **Definition E.4** (Strong  $\varepsilon$ -ball regret). Let  $\mathcal{A}$  be a contextual pricing algorithm which, at round  
 1219  $t \in [T]$  with context  $u_t$ , outputs a price  $p_t \in [0, 1]$  along with a confidence width  $w_t \in [0, 1]$ . For  
 1220  $\varepsilon \in (0, 1]$ , we say that  $\mathcal{A}$  achieves strong  $\varepsilon$ -ball regret  $R(T)$  for contextual search if, when  $K_\star = 1$   
 1221 and  $D_\star = \delta_{\theta_\star}$ , we have  $|p_t - v_t| \leq w_t$  for each round  $t$  and  $\sum_{t=1}^T \mathbb{1}\{w_t > \varepsilon\} \leq R(T)$ , where  
 1222  $v_t = \langle u_t, \theta_\star \rangle$ .

1223 That is,  $\mathcal{A}$  produces  $\varepsilon$ -accurate estimates for the true values, outside of up to  $R(T)$  rounds for  
 1224 exploration, and it can identify when these estimates are accurate. In practice, this tends to require  
 1225 that  $\mathcal{A}$  maintain a confidence set around  $\theta_\star$  whose width, when projected onto the current context, is  
 1226 greater than  $\varepsilon$  for at most  $R(T)$  rounds. Fortunately, there are existing efficient algorithms which  
 1227 achieve low  $\varepsilon$ -ball regret.

1228 **Lemma E.5** (18). *For  $\varepsilon \in (0, 1]$ , there exists an ellipsoid-based contextual search algorithm*  
 1229 *ProjectedVolume( $\varepsilon$ ) with strong  $\varepsilon$ -ball regret  $O(d \log(d/\varepsilon))$  and running time  $\text{poly}(d, 1/\varepsilon)$  per*  
 1230 *round.<sup>2</sup>*

1231 We now present our algorithm (Algorithm 5), which uses ProjectedVolume as a subroutine.

1232 **Overview of Algorithm 5** We maintain a set  $\mathcal{I}$  of observed types, initially empty, and an accuracy  
 1233  $\varepsilon$  (tuned to minimize regret). We will initialize an independent copy  $\mathcal{A}_i$  of ProjectedVolume for  
 1234 each  $i$  added to  $\mathcal{I}$ . Since these copies are simulated, we are free to query the price  $\text{price}(\mathcal{A}_i, u_t)$  and  
 1235 confidence width  $\text{width}(\mathcal{A}_i, u_t)$  for a context  $u_t$  without updating  $\mathcal{A}_i$ . Moreover, for each  $i \in \mathcal{I}$ ,  
 1236 the algorithm maintains a frequency count  $n_t(i)$ , recording the number of rounds which we have  
 1237 followed the recommended price of  $\mathcal{A}_i$ , along with an exploration count  $m_t(i)$ , recording the number  
 1238 of rounds which we have played the price of  $\mathcal{A}_i$  due to its lack of confidence along the current context.  
 1239 At each round  $t$ , we perform the following:

- 1240 • If there is an observed type  $i \in \mathcal{I}$  such that  $\text{width}(\mathcal{A}_i, u_t) > \varepsilon$  and that its number of  
 1241 exploration plays  $m_t(i)$  is below a threshold of  $\varepsilon T / K_\star$ , the algorithm plays  $\text{price}(\mathcal{A}_i, u_t)$ ,  
 1242 observes the outcome and the realized type  $z_t$ , and updates  $\mathcal{A}_i$  if  $z_t = i$ . In addition, we  
 1243 increment  $n_t(i)$  and  $m_t(i)$ .
- 1244 • Otherwise, it defines active set  $\mathcal{S} = \{i \in \mathcal{I} : \text{width}(\mathcal{A}_i, u_t) \leq \varepsilon\}$ , computes for each  $i \in \mathcal{S}$   
 1245 the score

$$F(i) = \sum_{j \in \mathcal{S}} \frac{n_t(j)}{t-1} \mathbb{1}\{\text{price}(\mathcal{A}_j, u_t) \geq \text{price}(\mathcal{A}_i, u_t)\},$$

<sup>2</sup>Although [18] state a slightly weaker guarantee, instead bounding  $\sum_{t=1}^T \mathbb{1}\{|p_t - v_t| > \varepsilon\} = O(d \log(d/\varepsilon))$ , this strengthened result is immediate from their proof.



1246 and plays  $p_t = \max\{\text{price}(\mathcal{A}_{i^*}, u_t) - \varepsilon, 0\}$  where  $i^* \in \arg \max_{i \in \mathcal{S}} \{F(i) \cdot \text{price}(\mathcal{A}_i, u_t)\}$ .  
 1247 It then observes  $y_t$  and  $z_t$  and updates the frequency count  $n_{t+1}(z_t)$ . Here,  $F$  is an estimate  
 1248 for the demand at the price suggested by  $\mathcal{A}_i$ , and so  $i^*$  is an estimate for the revenue  
 1249 maximizing type. We pull back the price recommended by  $\mathcal{A}_{i^*}$  by  $\varepsilon$  to avoid issues due to  
 1250 estimation error.

---

**ALGORITHM 5:** Contextual Pricing with Ex-Post Type Identification

---

```

1 initialize: observed types  $\mathcal{I} = \emptyset, \varepsilon = \sqrt{d \log(T)/T}$ ;
2 for each round  $t \in [T]$  do
3   observe context  $u_t$ ;
4   if exists  $i \in \mathcal{I}$  such that  $\text{width}(\mathcal{A}_i, u_t) > \varepsilon$  and  $m_t(i) < \varepsilon T$  then
5     play  $p_t = \text{price}(\mathcal{A}_i, u_t)$  and observe  $y_t$ ;
6     observe type  $z_t \in [K_\star]$ ;
7     update algorithm  $\mathcal{A}_i$  with  $y_t$  if  $z_t = i$ ;
8     increment  $m_t(i)$  by 1;
1251  else
10    let  $\mathcal{S} = \{i \in \mathcal{I} : \text{width}(\mathcal{A}_i, u_t) \leq \varepsilon\}$ ;
11    define  $F(i) = \sum_{j \in \mathcal{S}} \frac{n_t(j)}{t-1} \cdot \mathbb{1}\{\text{price}(\mathcal{A}_j, u_t) \geq \text{price}(\mathcal{A}_i, u_t)\}$  for each  $i \in \mathcal{S}$ ;
12    set  $i^* = \arg \max_{i \in \mathcal{S}} F(i) \cdot \text{price}(\mathcal{A}_i, u_t)$ ;
13    play  $p_t = \max\{\text{price}(\mathcal{A}_{i^*}, u_t) - \varepsilon, 0\}$  and observe  $y_t$ ;
14    observe type  $z_t \in [K_\star]$ ;
15    increment  $n_t(z_t)$  by 1;
16    if  $z_t \notin \mathcal{I}$  then
17      initialize copy  $\mathcal{A}_{z_t}$  of  $\text{ProjectedVolume}(\varepsilon)$  and set  $\mathcal{I} \leftarrow \mathcal{I} \cup \{z_t\}$ ;

```

---

1252 **Bounding exploration regret.** Write  $\mathcal{T}_1$  for the set of exploration rounds. By design, an exploration  
 1253 round is one in which some type  $i$  is used with  $\text{width}(\mathcal{A}_i, u_t) > \varepsilon$  and exploration counter satisfying  
 1254  $m_t(i) < \varepsilon T$ . Trivially,  $|\mathcal{T}_1| \leq \varepsilon T$ , so we can incur regret at most  $\varepsilon T = \tilde{O}(\sqrt{dT})$  during exploration.

1255 **Bounding mass of types which saturate exploration threshold.** Next, consider any type  $i$  that has  
 1256 been explored sufficiently so that  $m_T(i) = \varepsilon T$  after time  $T$ ; denote by  $\mathcal{S}'$  the set of all such types.  
 1257 We will show that  $D_\star$  plays small mass on  $\mathcal{S}'$ . Fix  $i \in \mathcal{S}'$  and write  $\mathcal{T}_{1,i}$  for the exploration rounds  
 1258 where we follow  $\mathcal{A}_i$ . Conditioned on  $\mathcal{T}_{1,i}$ , we note that  $X_t = \mathbb{1}\{z_t = i\}$ ,  $t \in \mathcal{T}_{1,i}$ , are i.i.d. Bernoulli  
 1259 random variables with  $\Pr(X_t = 1) = D_\star(i)$ . Defining

$$S_i = \sum_{\tau \in \mathcal{T}_{1,i}} X_\tau,$$

1260 our guarantee for  $\text{ProjectedVolume}$  (Lemma E.5) and the width condition for exploration imply  
 1261 that  $S_i = O(d \log(d/\varepsilon))$ . On the other hand, by Bernstein's inequality (Lemma E.3), we have

$$S_i \geq m_T(i) D_\star(i) - \sqrt{2 m_T(i) D_\star(i) \log(T)} - \frac{1}{3} \log(T).$$

1262 with probability at least  $1 - 1/T$ . Since  $m_T(i) = \varepsilon T = \sqrt{dT \log(T)}$ , the dominant term is  
 1263  $m_T(i) D_\star(i)$  for  $T$  greater than a sufficiently large constant. Thus, we deduce that

$$\varepsilon T D_\star(i) \leq O\left(d \log \frac{d}{\varepsilon}\right),$$

1264 or equivalently,

$$D_\star(i) \leq O\left(\frac{d \log(d/\varepsilon)}{\varepsilon T}\right).$$

1265 Summing over all types in  $\mathcal{S}'$  (of which there are at most  $K_\star$ ) and taking a union bound, the total  
 1266 mass in  $\mathcal{S}'$  is at most

$$D_\star(\mathcal{S}') = \sum_{i \in \mathcal{S}'} D_\star(i) \leq O\left(\frac{K_\star d \log(d/\varepsilon)}{\varepsilon T}\right) = \tilde{O}\left(K_\star \sqrt{d/T}\right) \quad (7)$$

1267 with probability at least  $1 - K_*/T$ . We condition on this bound holding for the remainder of the  
 1268 proof, since doing so contributes a negligible  $K_*$  to the regret. We also condition on the event that,  
 1269 for each round  $t \in [T]$  the empirical frequencies of (all) types deviate from their true masses by at  
 1270 most  $O(\sqrt{K_* \log(T)/t})$  in total variation. This is permissible by Lemma E.2 and a union bound  
 1271 over rounds.

1272 **Bounding exploitation regret.** Fix an exploitation round  $t$ , and recall the set of accurately estimated  
 1273 types

$$\mathcal{S} = \{i \in \mathcal{I} : \text{width}(\mathcal{A}_i, u_t) \leq \varepsilon\}.$$

1274 Write  $v_1, \dots, v_{K_*} \in [0, 1]$  for the true values at round  $t$ . By our construction and the  $\varepsilon$ -ball guarantee  
 1275 for ProjectedVolume,  $\mathcal{A}_i$  returns a price that is an  $\varepsilon$ -accurate estimate of  $v_i$ , for each  $i \in \mathcal{S}$ .  
 1276 Moreover, by our analysis above, the mass on types outside of  $\mathcal{S}$  is quite small. We thus bound

$$\begin{aligned} \text{dem}_*(p_t, u_t) &= \sum_{i=1}^{K_*} D_*(i) \mathbb{1}\{v_i \geq p_t\} \\ &\geq \sum_{i \in \mathcal{S}} D_*(i) \mathbb{1}\{v_i \geq p_t\} - \tilde{O}\left(K_* \sqrt{d/T}\right) \quad (\text{Eq. (7)}) \\ &\geq \sum_{i \in \mathcal{S}} \frac{n_t(i)}{t-1} \mathbb{1}\{v_i \geq p_t\} - \tilde{O}\left(K_* \sqrt{d/T}\right) - O(\sqrt{K_* \log(T)/t}) \quad (\text{TV bound}) \\ &\geq \sum_{i \in \mathcal{S}} \frac{n_t(i)}{t-1} \mathbb{1}\{v_i \geq \text{price}(\mathcal{A}_{i^*}, u_t) - \varepsilon\} - \tilde{O}\left(K_* \sqrt{d \log(T)/t}\right) \quad (\text{choice of } p_t) \\ &\geq \sum_{i \in \mathcal{S}} \frac{n_t(i)}{t-1} \mathbb{1}\{\text{price}(\mathcal{A}_i, u_t) \geq \text{price}(\mathcal{A}_{i^*}, u_t)\} - \tilde{O}\left(K_* \sqrt{d \log(T)/t}\right) \quad (i \in \mathcal{S}) \\ &= F(i_*) - \tilde{O}\left(K_* \sqrt{d \log(T)/t}\right). \quad (\text{choice of } F) \end{aligned}$$

1277 Consequently, we bound  $\text{rev}_*(p_t, u_t) + \tilde{O}\left(K_* \sqrt{d \log(T)/t}\right)$  from below by

$$\begin{aligned} p_t F(i^*) &\geq \text{price}(\mathcal{A}_{i^*}, u_t) F(i^*) - \varepsilon \\ &= \max_{j \in \mathcal{S}} \text{price}(\mathcal{A}_j, u_t) F(j) - \varepsilon \quad (\text{choice of } i^*) \\ &= \max_{p \in [0,1]} p \sum_{i \in \mathcal{S}} \frac{n_t(i)}{t-1} \mathbb{1}\{\text{price}(\mathcal{A}_i, u_t) \geq p\} - \varepsilon \quad (\text{rev. maximized at jump}) \\ &\geq \max_{p \in [0,1]} p \sum_{i \in \mathcal{S}} D_*(i) \mathbb{1}\{\text{price}(\mathcal{A}_i, u_t) \geq p\} - \varepsilon - \tilde{O}\left(K_* \sqrt{d \log(T)/t}\right) \quad (\text{TV bound}) \\ &\geq \max_{p \in [0,1]} p \sum_{i \in \mathcal{S}} D_*(i) \mathbb{1}\{v_i \geq p + \varepsilon\} - \varepsilon - \tilde{O}\left(K_* \sqrt{d \log(T)/t}\right) \quad (i \in \mathcal{S}) \\ &\geq \max_{p \in [0,1]} p \sum_{i=1}^{K_*} D_*(i) \mathbb{1}\{v_i \geq p + \varepsilon\} - \varepsilon - \tilde{O}\left(K_* \sqrt{d \log(T)/t}\right) \quad (\text{Eq. (7)}) \\ &= \max_{p \in [0,1]} p \text{dem}_*(p + \varepsilon, u_t) - \varepsilon - \tilde{O}\left(K_* \sqrt{d \log(T)/t}\right) \\ &= \max_{p \in [0,1]} \text{rev}_*(p + \varepsilon, u_t) - 2\varepsilon - \tilde{O}\left(K_* \sqrt{d \log(T)/t}\right) \\ &= \max_{p \in [0,1]} \text{rev}_*(p, u_t) - 3\varepsilon - \tilde{O}\left(K_* \sqrt{d \log(T)/t}\right). \end{aligned}$$

1278 All together, we see that playing  $p_t$  incurs regret at most  $\tilde{O}\left(K_* \sqrt{d \log(T)/t}\right)$ . Summing over  
 1279 exploitation rounds and adding the exploration regret gives a total bound of

$$R(T) = \sum_{t=1}^T \tilde{O}\left(K_* \sqrt{d \log(T)/t}\right) + \tilde{O}(\sqrt{dT}) = \tilde{O}(K_* \sqrt{dT}),$$

1280 as desired.  $\square$

1281 **E.2 Observed Type Vectors (Proof of Theorem 5.2)**

1282 We first show that  $\text{rev}_{\hat{D}_\tau}$  concentrates tightly around  $\text{rev}_*$ , using a simple VC bound.

1283 **Lemma E.6.** Fix  $D \in \Delta_K(\Theta)$  and let  $\hat{D}_t$  be the empirical measure of  $t$  i.i.d. samples from  $D$ . We  
1284 then have

$$\sup_{p \in [0,1], u \in \mathcal{U}} |\text{rev}_D(p, u) - \text{rev}_{\hat{D}_t}(p, u)| = O\left(\sqrt{\frac{\min\{K, d\} \log(t) + \log(1/\delta)}{t}}\right)$$

1285 with probability at least  $1 - \delta$ .

1286 *Proof.* We compute

$$\begin{aligned} \sup_{p \in [0,1], u \in \mathcal{U}} |\text{rev}_D(p, u) - \text{rev}_{\hat{D}_t}(p, u)| &\leq \sup_{p \in [0,1], u \in \mathcal{U}} |\text{dem}_D(p, u) - \text{dem}_{\hat{D}_t}(p, u)| \\ &= \sup_{f \in \mathcal{F}} \left| \mathbb{E}_{\theta \sim D} [f(\theta)] - \mathbb{E}_{\theta \sim \hat{D}_t} [f(\theta)] \right|, \end{aligned}$$

1287 where  $\mathcal{F}$  is the space of linear threshold functions  $f_{p,u} : \text{supp}(D) \rightarrow \{0, 1\}$  given by  $f_{p,u}(\theta) =$   
1288  $\mathbb{1}\{\langle u, \theta \rangle \geq p\}$ . The result then follows by Lemma E.2.  $\square$

1289 Now, our best response policy ensures that, at each round  $t > 1$ , we have

$$\begin{aligned} \text{rev}_*(p_t, u_t) &= \text{rev}_{\hat{D}_{t-1}}(p_t, u_t) + \text{rev}_*(p_t, u_t) - \text{rev}_{\hat{D}_{t-1}}(p_t, u_t) \\ &\geq \text{rev}_{\hat{D}_{t-1}}(\text{br}_*(u_t), u_t) - \sup_{p \in [0,1], u \in \mathcal{U}} |\text{rev}_*(p, u) - \text{rev}_{\hat{D}_{t-1}}(p, u)| \\ &\geq \text{rev}_*(\text{br}_*(u_t), u_t) - 2 \sup_{p \in [0,1], u \in \mathcal{U}} |\text{rev}_*(p, u) - \text{rev}_{\hat{D}_{t-1}}(p, u)|. \end{aligned}$$

1290 Consequently, regret is at most

$$\begin{aligned} R(T) &\leq 1 + 2 \sum_{t=1}^{T-1} \sup_{p \in [0,1], u \in \mathcal{U}} |\text{rev}_*(p, u) - \text{rev}_{\hat{D}_t}(p, u)| \\ &= O\left(\sqrt{\min\{K_*, d\}} \sum_{t=1}^{T-1} \sqrt{\frac{\log(t)}{t}}\right) \quad (\text{Lemma E.6 with } \delta = t^{-2}) \\ &= \tilde{O}(\sqrt{\min\{K_*, d\}T}), \end{aligned}$$

1291 as desired.  $\square$
